# Supplementary material for: Coronene-based quantum dots for the delivery of the doxorubicin anticancer drug: a computational study
Source: Royal Society of Chemistry journal article supplement (doi:10.1039/d2nj00636g), 2022-01-01
Supplement: d2nj00636g1.pdf [file d2nj00636g1.pdf]

## Electronic Supplementary Information

for

Coronene-based quantum dots for delivery of the  
doxorubicin anticancer drug: A computational study †

Soode Amigh and Afshan Mohajeri\*

Department of Chemistry, College of Sciences, Shiraz University, Shiraz 7194684795, Iran

Orcid.org/0000-0002-3858-3024, E-mail: [amohajeri@shirazu.ac.ir](mailto:amohajeri@shirazu.ac.ir) (A.M)

## Table of content

- Fig. S1. Emission spectra of DOX at different levels of theory.
- Fig. S2. Orbital interaction diagrams using CDA analysis for DOX/carrier complexes
- Fig. S3. The optimized structure of DOX/CCs in the presence of H<sup>+</sup>. QTAIM topological parameters for DOX/CC complexes.
- Table S1. QTAIM topological parameters at BCPs of interaction contacts in considered systems (au).
- Table S2. Wavelength and major orbital contributions to the crucial electronic transitions for all studied systems.
- Table S3. The recovery time for DOX/CCs in the absence of radiation.
- Cartesian coordinates of isolated DOX and CC as well as their complexes in gas and aqueous phases.

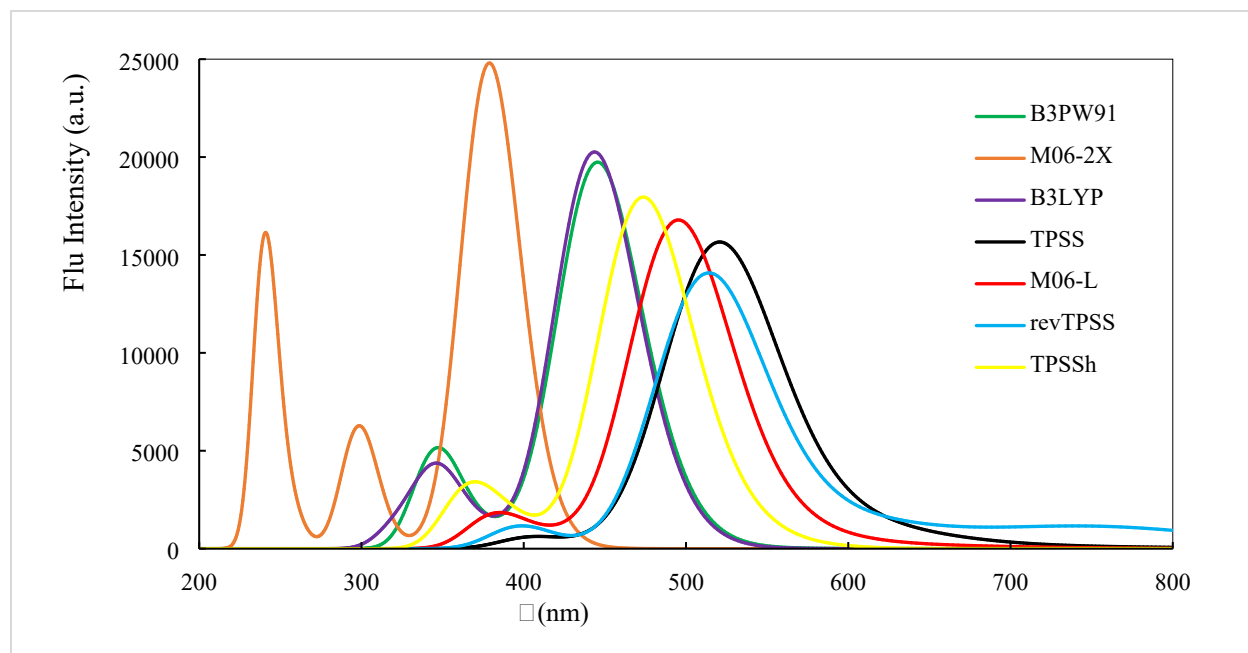

**Fig. S1.** Emission spectra of DOX at different levels of theory. The experimental emission wavelength is 560nm.

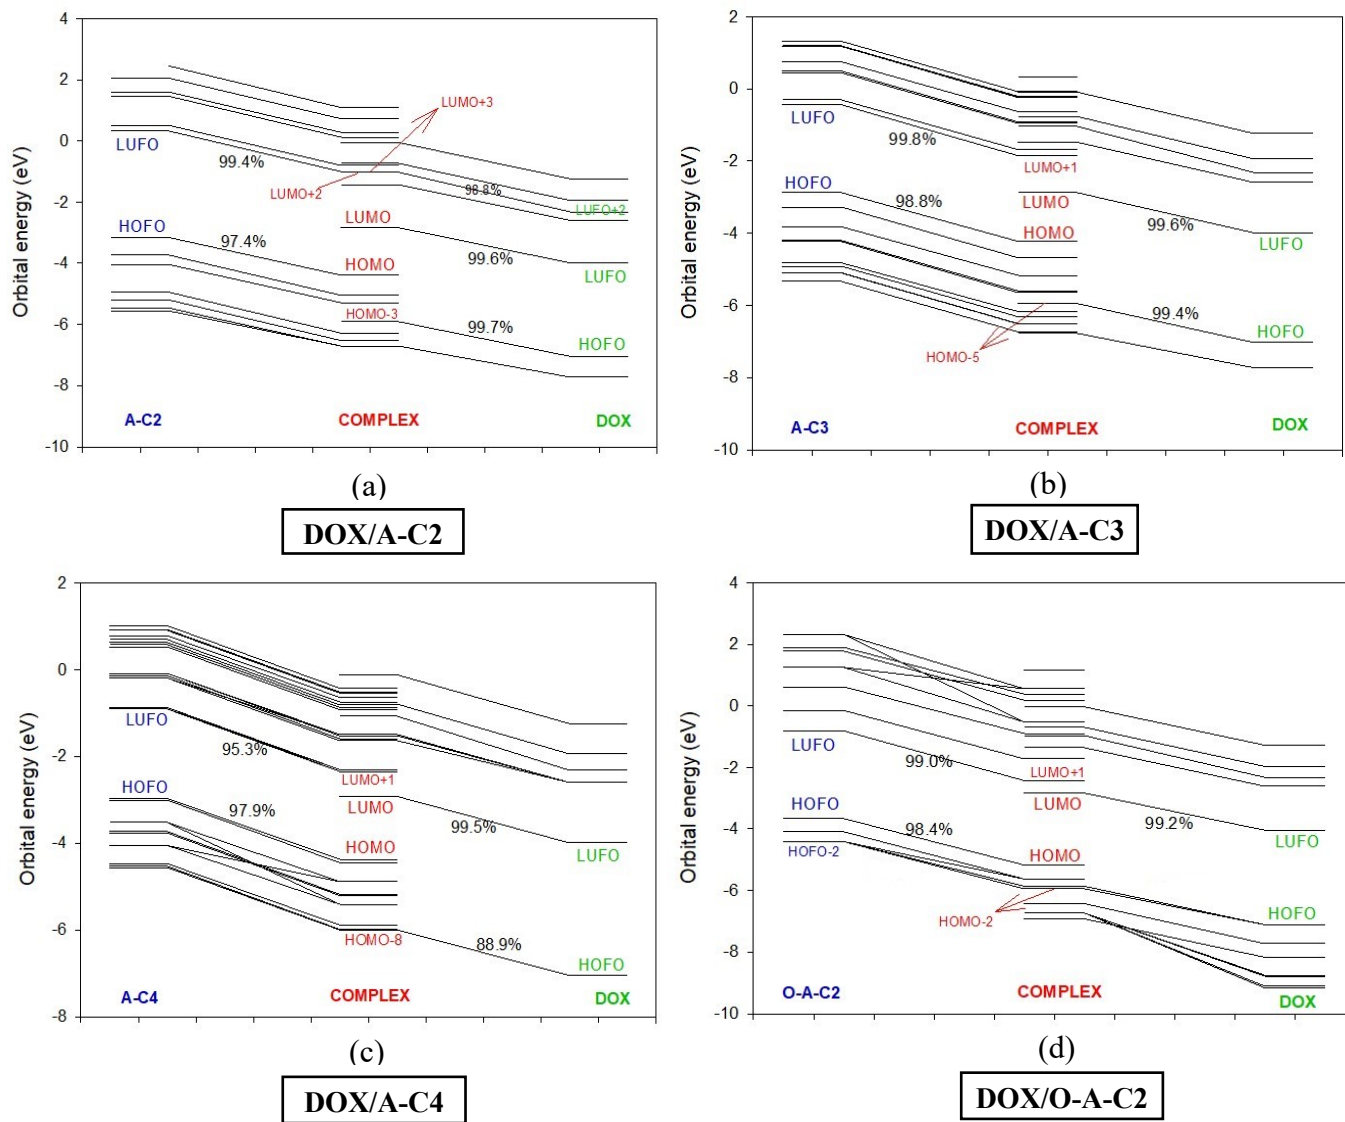

**Fig. S2.** Orbital interaction diagrams using CDA analysis for (a) DOX/A-C2, (b) DOX/A-C3, (c) DOX/A-C4, and (d) DOX/O-A-C2 complexes.

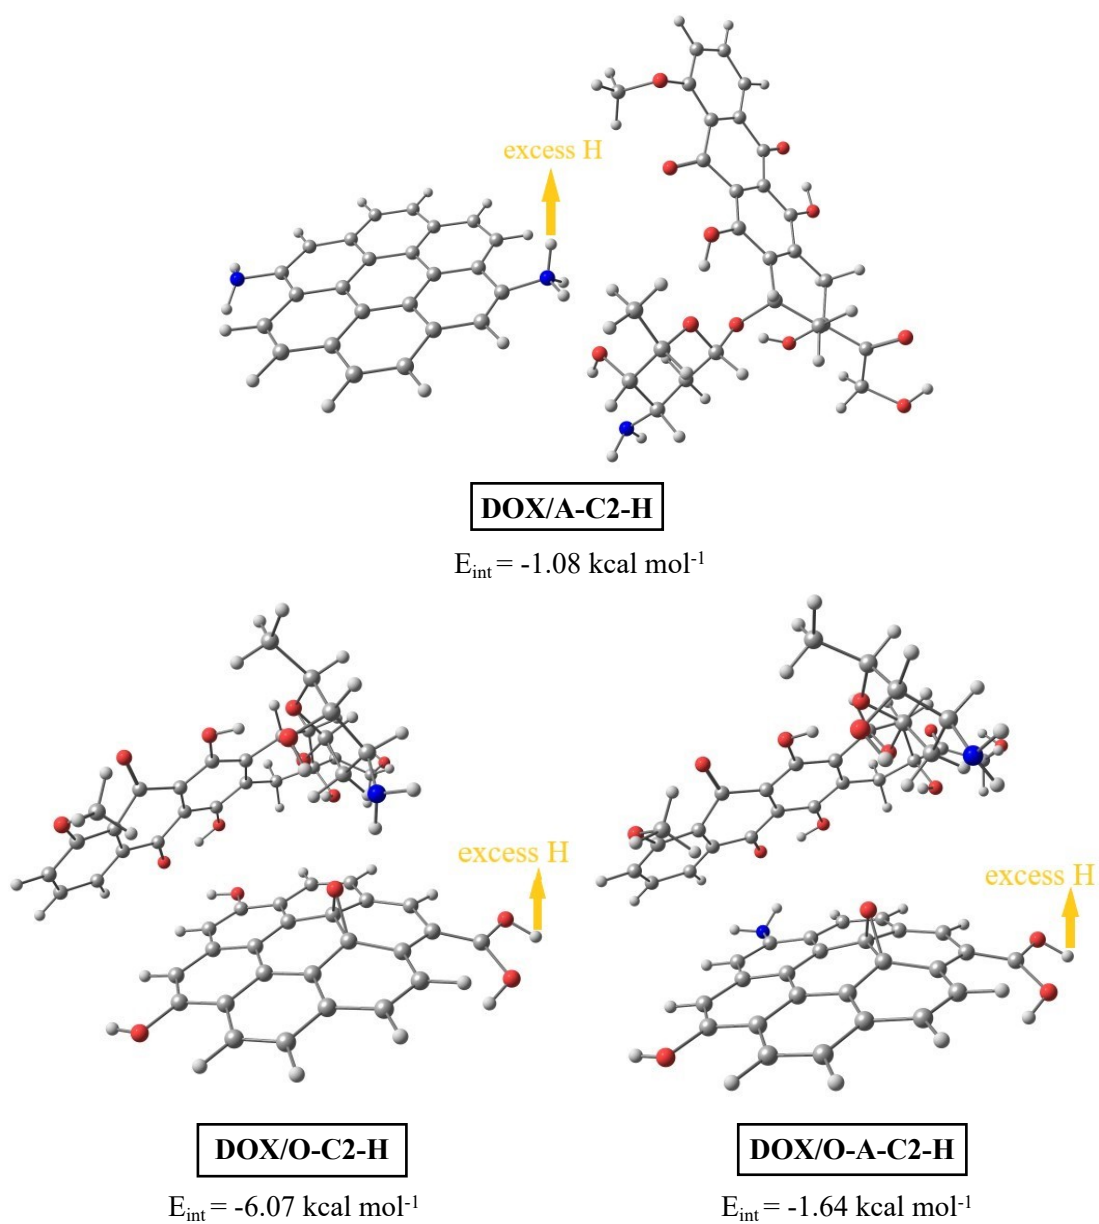

**Fig. S3.** The optimized structure of DOX/CCs in the presence of  $\text{H}^+$ .

**Table S1.** QTAIM topological parameters at BCPs of interaction contacts in considered systems (au).

| Complex           | BCP   | R(Å) | $\rho(r)$ | $\nabla^2\rho(r)$ | $G(r)$ | $V(r)$  | $H(r)$  | $G(r)/ V(r) $ |
|-------------------|-------|------|-----------|-------------------|--------|---------|---------|---------------|
| <b>DOX/A-C2</b>   | O...H | 2.69 | 0.0060    | 0.0227            | 0.0047 | -0.0037 | 0.0010  | 1.2622        |
|                   | O...H | 2.17 | 0.0158    | 0.0529            | 0.0130 | -0.0128 | 0.0002  | 1.0177        |
|                   | O...H | 2.50 | 0.0083    | 0.0339            | 0.0074 | -0.0064 | 0.0011  | 1.1655        |
|                   | N...H | 3.29 | 0.0022    | 0.0076            | 0.0014 | -0.0009 | 0.0005  | 1.5559        |
|                   | O...H | 2.31 | 0.0124    | 0.0433            | 0.0104 | -0.0100 | 0.0004  | 1.0400        |
|                   | O...H | 2.35 | 0.0112    | 0.0416            | 0.0094 | -0.0085 | 0.0010  | 1.1142        |
| <b>DOX/O-C2</b>   | O...H | 2.38 | 0.0107    | 0.0366            | 0.0085 | -0.0079 | 0.0006  | 1.0807        |
|                   | O...H | 2.40 | 0.0100    | 0.0417            | 0.0093 | -0.0081 | 0.0012  | 1.1440        |
|                   | O...H | 2.47 | 0.0097    | 0.0317            | 0.0073 | -0.0066 | 0.0006  | 1.0975        |
|                   | O...H | 2.91 | 0.0098    | 0.0379            | 0.0088 | -0.0081 | 0.0007  | 1.0855        |
|                   | O...H | 1.80 | 0.0355    | 0.1098            | 0.0285 | -0.0295 | -0.0010 | 0.9647        |
| <b>DOX/O-A-C2</b> | O...H | 2.12 | 0.0179    | 0.0570            | 0.0143 | -0.0144 | -0.0001 | 0.9948        |
|                   | O...H | 3.09 | 0.0024    | 0.0098            | 0.0018 | -0.0011 | 0.0007  | 1.6507        |
|                   | O...H | 2.63 | 0.0075    | 0.0281            | 0.0059 | -0.0048 | 0.0011  | 1.2313        |
|                   | O...H | 2.34 | 0.0121    | 0.0398            | 0.0096 | -0.0093 | 0.0003  | 1.0342        |
|                   | O...N | 3.32 | 0.0052    | 0.0205            | 0.0043 | -0.0035 | 0.0008  | 1.2262        |
| <b>DOX/A-C3</b>   | O...H | 2.79 | 0.0056    | 0.0215            | 0.0043 | -0.0033 | 0.0010  | 1.3121        |
|                   | O...H | 2.13 | 0.0174    | 0.0563            | 0.0141 | -0.0141 | 0.0000  | 0.9977        |
|                   | O...H | 2.54 | 0.0078    | 0.0333            | 0.0071 | -0.0060 | 0.0012  | 1.1960        |
|                   | O...H | 2.32 | 0.0122    | 0.0423            | 0.0102 | -0.0098 | 0.0004  | 1.0415        |
|                   | O...H | 2.42 | 0.0100    | 0.0383            | 0.0085 | -0.0074 | 0.0011  | 1.1480        |
|                   | N...H | 3.02 | 0.0041    | 0.0127            | 0.0025 | -0.0019 | 0.0006  | 1.3319        |
| <b>DOX/A-C4</b>   | O...H | 2.69 | 0.0057    | 0.0227            | 0.0047 | -0.0036 | 0.0010  | 1.2818        |
|                   | O...H | 2.19 | 0.0167    | 0.0524            | 0.0134 | -0.0138 | -0.0003 | 0.9767        |
|                   | N...H | 3.02 | 0.0039    | 0.0125            | 0.0025 | -0.0019 | 0.0006  | 1.3478        |
|                   | O...H | 2.57 | 0.0074    | 0.0317            | 0.0068 | -0.0056 | 0.0012  | 1.2057        |
|                   | O...H | 2.20 | 0.0151    | 0.0489            | 0.0121 | -0.0120 | 0.0001  | 1.0093        |
|                   | O...H | 2.70 | 0.0064    | 0.0245            | 0.0050 | -0.0040 | 0.0011  | 1.2713        |
|                   | O...H | 3.30 | 0.0015    | 0.0061            | 0.0011 | -0.0006 | 0.0005  | 1.7716        |

**Table S2.** Wavelength ( $\lambda$ ), and major orbital contributions to the crucial electronic transitions for all studied systems.

| Systems           | Transitions           | $\lambda$<br>(nm) | Major contributions                                |
|-------------------|-----------------------|-------------------|----------------------------------------------------|
|                   |                       |                   | Hole $\rightarrow$ Electron (%)                    |
| <b>DOX</b>        | $S_0 \rightarrow S_3$ | 521               | H-1>L (10%), H>L (74%)                             |
| <b>A-C2</b>       | $S_0 \rightarrow S_8$ | 325               | H-5>L (10%), H-1>L+1 (59%), H>L (11%)              |
| <b>A-C3</b>       | $S_0 \rightarrow S_8$ | 474               | H-1>L (56%), H>L+1 (20%)                           |
| <b>A-C4</b>       | $S_0 \rightarrow S_6$ | 656               | H-1>L (19%), H-1>L+1 (22%), H>L (15%), H>L+1 (14%) |
| <b>O-C2</b>       | $S_0 \rightarrow S_5$ | 380               | H-1>L+1 (22%), H>L+1 (19%), H>L+2 (26%)            |
| <b>O-A-C2</b>     | $S_0 \rightarrow S_6$ | 388               | H-1>L+1 (26%), H>L+1 (13%), H>L+2 (28%)            |
| <b>DOX/A-C2</b>   | $S_0 \rightarrow S_8$ | 522               | H-3>L (74%)                                        |
| <b>DOX/A-C3</b>   | $S_0 \rightarrow S_4$ | 702               | H-1>L+2 (20%), H>L+1 (77%)                         |
| <b>DOX/A-C4</b>   | $S_0 \rightarrow S_5$ | 820               | H-1>L+1 (29%), H>L+2 (56%)                         |
| <b>DOX/O-C2</b>   | $S_0 \rightarrow S_6$ | 548               | H-6>L (14%), H-5>L (42%), H-2>L (37%)              |
| <b>DOX/O-A-C2</b> | $S_0 \rightarrow S_9$ | 604               | H-6>L (52%), H-3>L (18%)                           |

**Table S3.** The recovery time of DOX/CC complexes (Seconds) in the absence of radiation at room temperature (298 K), body temperature (310 K), and cancer tissue temperature (315 K) in the gas and the solvent phase.

| system            | Gas              |                  |                         | Water            |                  |                         |
|-------------------|------------------|------------------|-------------------------|------------------|------------------|-------------------------|
|                   | Room temperature | Body temperature | Cancer cell temperature | Room temperature | Body temperature | Cancer cell temperature |
| <b>DOX/A-C2</b>   | 5.66E+03         | 4.05E+03         | 3.55E+03                | 1.59E+04         | 1.10E+04         | 9.45E+03                |
| <b>DOX/A-C3</b>   | 3.09E+04         | 2.07E+04         | 1.77E+04                | 1.72E+05         | 1.08E+05         | 8.95E+04                |
| <b>DOX/A-C4</b>   | 1.36E+05         | 8.59E+04         | 7.18E+04                | 2.49E+05         | 1.54E+05         | 1.27E+05                |
| <b>DOX/O-C2</b>   | 7.15E+05         | 4.24E+05         | 3.45E+05                | 1.99E+06         | 1.13E+06         | 9.08E+05                |
| <b>DOX/O-A-C2</b> | 3.99E+03         | 2.90E+03         | 2.55E+03                | 4.84E+03         | 3.49E+03         | 3.06E+03                |



## Cartesian coordinates (Å) for the studied compounds in gas phase

### DOX

|   | X         | Y         | Z         |
|---|-----------|-----------|-----------|
| C | 7.154572  | 0.764032  | 0.139183  |
| C | 6.070704  | 1.584357  | 0.432917  |
| C | 4.770721  | 1.074477  | 0.3459    |
| C | 4.530974  | -0.273209 | 0.000188  |
| C | 5.643003  | -1.088842 | -0.309625 |
| C | 6.937064  | -0.558522 | -0.24241  |
| H | 8.166981  | 1.154714  | 0.191216  |
| H | 6.202338  | 2.622725  | 0.715227  |
| H | 7.764522  | -1.207708 | -0.513282 |
| C | 2.276961  | 1.54596   | 0.301141  |
| C | 1.2224    | 2.47888   | 0.37443   |
| C | -0.092545 | 2.098913  | 0.014333  |
| C | -0.326483 | 0.794775  | -0.405351 |
| C | 0.71328   | -0.181418 | -0.411585 |
| C | 2.021152  | 0.194297  | -0.070709 |
| C | 3.129056  | -0.807631 | -0.003974 |
| C | 3.640312  | 2.000473  | 0.592948  |
| C | -1.165974 | 3.162708  | 0.061358  |
| C | -2.602093 | 2.621937  | -0.086862 |
| C | -2.622946 | 1.554013  | -1.200065 |
| C | -1.704654 | 0.379448  | -0.864074 |
| H | -0.978462 | 3.897956  | -0.731708 |
| H | -3.643704 | 1.183012  | -1.352841 |
| O | 5.509438  | -2.367444 | -0.775647 |
| O | 3.868548  | 3.160673  | 0.99178   |
| O | 2.916529  | -2.008678 | 0.08852   |
| O | 0.477295  | -1.439995 | -0.838013 |
| O | 1.400896  | 3.75394   | 0.757589  |
| H | -0.436919 | -1.742152 | -0.658159 |
| H | 2.371306  | 3.848268  | 0.966688  |
| C | 5.566074  | -3.404779 | 0.209028  |
| H | 5.516518  | -4.344438 | -0.344832 |
| H | 6.510286  | -3.360911 | 0.769022  |
| H | 4.713767  | -3.334965 | 0.889211  |
| O | -3.293604 | 4.456398  | -1.478332 |

|  |   |           |           |           |              |
|--|---|-----------|-----------|-----------|--------------|
|  | C | -3.533498 | 3.766794  | -0.499476 |              |
|  | C | -4.789426 | 4.031168  | 0.312598  |              |
|  | H | -5.374053 | 3.100053  | 0.366851  |              |
|  | H | -4.487099 | 4.250832  | 1.348889  |              |
|  | O | -5.539741 | 5.075139  | -0.245685 |              |
|  | H | -5.013596 | 5.39368   | -1.004902 |              |
|  | O | -3.102958 | 2.10452   | 1.142565  |              |
|  | H | -2.829909 | 1.172347  | 1.210855  |              |
|  | O | -2.290605 | -0.407918 | 0.225979  |              |
|  | C | -3.057231 | -1.5094   | -0.17113  |              |
|  | C | -3.829012 | -2.038472 | 1.027896  |              |
|  | C | -4.563136 | -3.331513 | 0.649226  |              |
|  | H | -3.112181 | -2.242286 | 1.829395  |              |
|  | C | -2.747258 | -3.717818 | -1.088733 |              |
|  | C | -3.56533  | -4.34986  | 0.047174  |              |
|  | O | -2.143179 | -2.483993 | -0.65469  |              |
|  | O | -2.69891  | -4.822915 | 1.053362  |              |
|  | N | -5.140548 | -3.943525 | 1.854857  |              |
|  | C | -1.623192 | -4.608406 | -1.593518 |              |
|  | H | -1.062817 | -4.100033 | -2.383805 |              |
|  | H | -0.94429  | -4.852169 | -0.773438 |              |
|  | H | -2.033079 | -5.539774 | -1.998122 |              |
|  | H | -5.854877 | -4.624942 | 1.602203  |              |
|  | H | -5.593882 | -3.242417 | 2.437498  |              |
|  | H | -3.256762 | -4.855855 | 1.857172  |              |
|  | H | -4.535364 | -1.274164 | 1.374979  |              |
|  | H | -3.743427 | -1.233442 | -0.993456 |              |
|  | H | -5.321914 | -3.096936 | -0.117584 |              |
|  | H | -4.143282 | -5.182813 | -0.397589 |              |
|  | H | -3.445715 | -3.48514  | -1.911164 |              |
|  | H | -1.092757 | 3.709005  | 1.007467  | 1928.5185207 |
|  | H | -1.609979 | -0.276921 | -1.735791 |              |
|  | H | -2.298458 | 2.017147  | -2.138255 |              |

---

**E= -**  
(Hartree)

**A-C2**

|   | X         | Y         | Z         |
|---|-----------|-----------|-----------|
| C | 0.238497  | 3.738413  | -0.036924 |
| C | -0.777244 | 2.740509  | -0.032034 |
| C | -2.160889 | 3.061015  | -0.06072  |
| C | -2.768945 | 0.701065  | -0.000245 |
| C | -3.121191 | 2.079516  | -0.04893  |
| C | -3.754403 | -0.346806 | 0.043663  |
| C | 1.983158  | 2.037636  | -0.008226 |
| C | 1.567468  | 3.40075   | -0.023255 |
| C | 0.989775  | 1.021924  | -0.005902 |
| C | -0.393683 | 1.371099  | -0.012643 |
| C | -0.989774 | -1.021923 | -0.005901 |
| C | -1.391548 | 0.347918  | -0.002637 |
| C | -1.983153 | -2.03764  | -0.008222 |
| C | -3.351037 | -1.667685 | 0.029324  |
| C | 3.754401  | 0.346794  | 0.043664  |
| C | 3.35103   | 1.667685  | 0.029319  |
| C | 2.768943  | -0.70106  | -0.000249 |
| C | 1.391548  | -0.347912 | -0.002643 |
| C | 0.77724   | -2.740507 | -0.032035 |
| C | 0.39368   | -1.371098 | -0.012645 |
| C | -0.238488 | -3.738408 | -0.03692  |
| C | -1.567466 | -3.400743 | -0.023251 |
| C | 3.121185  | -2.079524 | -0.04893  |
| C | 2.160899  | -3.061012 | -0.060724 |
| H | -4.101829 | -2.455473 | 0.059303  |
| H | -2.454091 | 4.107407  | -0.103744 |
| H | -0.059419 | 4.78427   | -0.052511 |
| H | 2.328545  | 4.177568  | -0.025318 |
| H | 4.10183   | 2.455465  | 0.059285  |
| H | 4.16676   | -2.363914 | -0.114271 |
| H | 2.45409   | -4.107407 | -0.103749 |
| H | 0.059418  | -4.784267 | -0.052505 |
| H | -2.328535 | -4.177569 | -0.025314 |
| N | 5.114223  | 0.008906  | 0.04365   |
| H | 5.349204  | -0.78848  | 0.623064  |
| H | 5.722078  | 0.790715  | 0.259173  |
| H | -4.166755 | 2.363913  | -0.114271 |
| N | -5.114227 | -0.008888 | 0.043635  |
| H | -5.34919  | 0.788364  | 0.623246  |
| H | -5.722089 | -0.790736 | 0.259019  |

E= -1032.601577 (Hartree)

A-C3

|   | X         | Y         | Z         |
|---|-----------|-----------|-----------|
| C | 2.829087  | -4.909814 | 0.03212   |
| C | 1.430422  | -4.931366 | 0.015653  |
| C | 0.681128  | -6.157233 | 0.007835  |
| C | -1.430264 | -4.931412 | -0.01642  |
| C | -0.6809   | -6.15728  | -0.008761 |
| C | -2.829002 | -4.90993  | -0.032819 |
| C | 5.668257  | -2.499534 | 0.046981  |
| C | 4.982238  | -3.677654 | 0.061639  |
| C | 2.848287  | -2.46254  | 0.020244  |
| C | 3.550302  | -3.708702 | 0.034646  |
| C | 1.426111  | -2.463627 | 0.01189   |
| C | 0.713115  | -3.693265 | 0.006071  |
| C | -1.425979 | -2.463672 | -0.012483 |
| C | -0.712922 | -3.693257 | -0.006788 |
| C | -2.848211 | -2.462538 | -0.02051  |
| C | -3.550346 | -3.708781 | -0.034976 |
| C | -5.668463 | -2.49957  | -0.04659  |
| C | -4.982384 | -3.677734 | -0.061879 |
| C | 5.701152  | -0.000079 | -0.048899 |
| C | 4.996942  | -1.23035  | 0.004665  |
| C | 2.851648  | -0.000004 | 0.007415  |
| C | 3.567331  | -1.226997 | 0.016972  |
| C | 1.423603  | 0.000011  | 0.007685  |
| C | 0.710188  | -1.227484 | 0.001057  |
| C | -1.423508 | 0.000014  | -0.008528 |
| C | -0.710035 | -1.227492 | -0.001865 |
| C | -2.851552 | 0.00003   | -0.007596 |
| C | -3.567307 | -1.226992 | -0.016757 |
| C | -5.701273 | -0.000078 | 0.050977  |
| C | -4.99693  | -1.230431 | -0.003768 |
| C | 5.668397  | 2.499598  | 0.048605  |
| C | 4.996995  | 1.230345  | 0.005361  |
| C | 2.848322  | 2.462615  | 0.020474  |
| C | 3.567331  | 1.227017  | 0.017223  |
| C | 1.426134  | 2.463674  | 0.011734  |
| C | 0.710192  | 1.227524  | 0.000895  |
| C | -1.42612  | 2.463663  | -0.012971 |

|   |           |           |           |
|---|-----------|-----------|-----------|
| C | -0.71006  | 1.22753   | -0.002106 |
| C | -2.848359 | 2.462545  | -0.020903 |
| C | -3.567417 | 1.226972  | -0.016966 |
| C | -5.668533 | 2.499569  | -0.045703 |
| C | -4.997114 | 1.230352  | -0.003549 |
| C | 4.982296  | 3.677728  | 0.06323   |
| C | 2.829105  | 4.909923  | 0.032613  |
| C | 3.550361  | 3.708775  | 0.03531   |
| C | 1.430394  | 4.931482  | 0.01548   |
| C | 0.713039  | 3.693315  | 0.005715  |
| C | -1.430411 | 4.931499  | -0.017163 |
| C | -0.71304  | 3.693316  | -0.007383 |
| C | -2.829166 | 4.909936  | -0.033468 |
| C | -3.550449 | 3.708771  | -0.035323 |
| C | -4.982464 | 3.677705  | -0.061394 |
| C | 0.681048  | 6.157387  | 0.007416  |
| C | -0.681026 | 6.157397  | -0.009542 |
| H | -6.751976 | 2.534226  | -0.109104 |
| H | -6.751822 | -2.533805 | -0.111274 |
| H | -5.52042  | -4.621546 | -0.104574 |
| H | -3.373372 | -5.852011 | -0.043523 |
| H | -1.229838 | -7.095933 | -0.015537 |
| H | 1.230011  | -7.095878 | 0.014402  |
| H | 3.37344   | -5.851858 | 0.042649  |
| H | 5.520242  | -4.621472 | 0.103889  |
| H | 6.751647  | -2.533921 | 0.111455  |
| H | 6.75169   | 2.533663  | 0.114155  |
| H | 5.520231  | 4.621567  | 0.105931  |
| H | 3.373354  | 5.852039  | 0.043405  |
| H | 1.229942  | 7.096042  | 0.014116  |
| H | -1.229933 | 7.096063  | -0.016415 |
| H | -3.37351  | 5.852019  | -0.044113 |
| H | -5.520565 | 4.621494  | -0.103408 |
| N | -7.0974   | -0.000764 | 0.109885  |
| H | -7.498725 | 0.828546  | 0.526951  |
| H | -7.49743  | -0.827736 | 0.532894  |
| N | 7.097271  | -0.000114 | -0.106779 |
| H | 7.498395  | 0.827901  | -0.526669 |
| H | 7.498403  | -0.828523 | -0.525738 |

---

**E= -2179.6457101 (Hartree)**

**A-C4**

|   | X         | Y         | Z         |
|---|-----------|-----------|-----------|
| C | -8.439242 | 1.914003  | -0.038551 |
| C | -8.661643 | 0.563712  | -0.060063 |
| C | -5.360947 | 5.806516  | 0.035232  |
| C | -5.596235 | 4.409022  | 0.027412  |
| C | -6.899013 | 3.854697  | 0.022413  |
| C | -5.994367 | 1.586721  | 0.000405  |
| C | -7.121262 | 2.48034   | 0.007081  |
| C | -6.205154 | 0.18157   | -0.010176 |
| C | -7.536552 | -0.365042 | -0.017849 |
| C | -6.613652 | -2.641482 | 0.02661   |
| C | -7.70793  | -1.742425 | 0.022406  |
| C | -6.787217 | -4.045599 | 0.047509  |
| C | -2.565945 | 8.266648  | 0.027685  |
| C | -3.828245 | 7.762679  | 0.035302  |
| C | -2.941694 | 5.458315  | 0.024024  |
| C | -4.077343 | 6.340881  | 0.03232   |
| C | -3.149305 | 4.053119  | 0.020214  |
| C | -4.469323 | 3.523706  | 0.019826  |
| C | -3.556392 | 1.231355  | 0.004034  |
| C | -4.67755  | 2.115493  | 0.010797  |
| C | -3.76189  | -0.171197 | 0.001863  |
| C | -5.089323 | -0.700397 | -0.003335 |
| C | -4.170103 | -2.991948 | 0.008752  |
| C | -5.286289 | -2.109528 | 0.007675  |
| C | -4.371167 | -4.397522 | 0.021594  |
| C | -5.709293 | -4.922352 | 0.041421  |
| C | -4.808162 | -7.196891 | 0.044207  |
| C | -5.875166 | -6.355466 | 0.053037  |
| C | -0.108499 | 7.903347  | 0.006764  |
| C | -1.406623 | 7.407213  | 0.017697  |
| C | -0.504782 | 5.1083    | 0.010325  |
| C | -1.622039 | 5.985059  | 0.017873  |
| C | -0.710628 | 3.695227  | 0.010527  |
| C | -2.027235 | 3.169792  | 0.012041  |
| C | -1.118128 | 0.881329  | 0.002168  |
| C | -2.233334 | 1.760294  | 0.008638  |
| C | -1.323617 | -0.5277   | 0.001546  |

|   |           |           |           |
|---|-----------|-----------|-----------|
| C | -2.642962 | -1.053597 | -0.00115  |
| C | -1.731414 | -3.340936 | -0.000935 |
| C | -2.844548 | -2.463281 | 0.002209  |
| C | -1.935827 | -4.754151 | 0.004196  |
| C | -3.255477 | -5.277425 | 0.016682  |
| C | -2.349546 | -7.546473 | 0.016617  |
| C | -3.453102 | -6.701713 | 0.025435  |
| C | 2.349465  | 7.546481  | -0.017628 |
| C | 1.022889  | 7.051754  | -0.002639 |
| C | 1.935779  | 4.754211  | -0.004384 |
| C | 0.817254  | 5.63369   | 0.001652  |
| C | 1.7314    | 3.341003  | 0.00117   |
| C | 0.408388  | 2.814266  | 0.004309  |
| C | 1.323609  | 0.52776   | -0.000924 |
| C | 0.204867  | 1.409019  | 0.004954  |
| C | 1.118132  | -0.881275 | -0.001259 |
| C | -0.204865 | -1.408952 | -0.004265 |
| C | 0.710639  | -3.695149 | -0.010153 |
| C | -0.408387 | -2.814205 | -0.00378  |
| C | 0.504798  | -5.108242 | -0.010153 |
| C | -0.817265 | -5.63362  | -0.001848 |
| C | 0.108519  | -7.903334 | -0.007379 |
| C | -1.022901 | -7.05173  | 0.002046  |
| C | 4.808031  | 7.196963  | -0.045762 |
| C | 3.453011  | 6.701761  | -0.026487 |
| C | 4.371093  | 4.397603  | -0.022233 |
| C | 3.255401  | 5.277509  | -0.017279 |
| C | 4.170085  | 2.992023  | -0.008837 |
| C | 2.844528  | 2.463342  | -0.002062 |
| C | 3.761854  | 0.17122   | -0.001469 |
| C | 2.642946  | 1.053658  | 0.001819  |
| C | 3.556376  | -1.231335 | -0.003202 |
| C | 2.233321  | -1.760238 | -0.008051 |
| C | 3.149309  | -4.053022 | -0.019824 |
| C | 2.027239  | -3.169726 | -0.011293 |
| C | 2.941747  | -5.458208 | -0.023826 |
| C | 1.622081  | -5.98497  | -0.01787  |
| C | 2.566034  | -8.266556 | -0.028153 |
| C | 1.406691  | -7.40714  | -0.018039 |
| C | 5.875064  | 6.355572  | -0.054665 |
| C | 6.787182  | 4.045666  | -0.048745 |

|   |           |           |           |
|---|-----------|-----------|-----------|
| C | 5.709223  | 4.922447  | -0.042599 |
| C | 6.613635  | 2.641498  | -0.027287 |
| C | 5.286262  | 2.109546  | -0.007825 |
| C | 6.20515   | -0.181636 | 0.010517  |
| C | 5.089303  | 0.70038   | 0.003707  |
| C | 5.994336  | -1.586784 | 0.000198  |
| C | 4.67751   | -2.115463 | -0.01027  |
| C | 5.596149  | -4.408969 | -0.027198 |
| C | 4.469316  | -3.523664 | -0.019307 |
| C | 5.360911  | -5.806364 | -0.035295 |
| C | 4.077355  | -6.340747 | -0.032376 |
| C | 3.828313  | -7.762525 | -0.035653 |
| C | 7.707937  | 1.742346  | -0.022915 |
| C | 8.661822  | -0.564087 | 0.060622  |
| C | 7.536585  | 0.364903  | 0.017991  |
| C | 8.439229  | -1.914297 | 0.038985  |
| C | 7.121168  | -2.48045  | -0.00649  |
| C | 6.898917  | -3.854692 | -0.022128 |
| H | 6.886656  | 6.753525  | -0.070599 |
| H | 7.798087  | 4.447033  | -0.066711 |
| H | 8.706352  | 2.164246  | -0.083608 |
| H | 9.286568  | -2.596676 | 0.076899  |
| H | 7.752204  | -4.529998 | -0.025388 |
| H | 6.215984  | -6.479478 | -0.041383 |
| H | 4.685328  | -8.431967 | -0.043101 |
| H | -6.886753 | -6.753419 | 0.068572  |
| H | -7.798098 | -4.447001 | 0.06505   |
| H | -8.706425 | -2.164279 | 0.082155  |
| H | -9.286707 | 2.596261  | -0.076074 |
| H | -7.752368 | 4.529966  | 0.025363  |
| H | -6.216065 | 6.479625  | 0.041142  |
| H | -4.685271 | 8.432137  | 0.042611  |
| H | -2.405703 | 9.342103  | 0.028946  |
| H | 0.048294  | 8.979901  | 0.005113  |
| H | 2.504866  | 8.62325   | -0.023049 |
| H | 4.959052  | 8.273701  | -0.054027 |
| H | 2.405798  | -9.342023 | -0.029659 |
| H | -0.048263 | -8.979913 | -0.006016 |
| H | -2.504939 | -8.623267 | 0.021732  |
| H | -4.959201 | -8.273641 | 0.052157  |
| N | 9.955965  | -0.033303 | 0.069681  |



|   |           |           |           |
|---|-----------|-----------|-----------|
| N | -9.955592 | 0.032451  | -0.06763  |
| H | -10.6737  | 0.723227  | -0.253367 |
| H | -10.07473 | -0.772369 | -0.671925 |
| H | 10.076082 | 0.770559  | 0.67501   |
| H | 10.674732 | -0.724249 | 0.252416  |

**E= -3784.107974 (Hartree)**

**O-C2**

|   | X         | Y         | Z         |
|---|-----------|-----------|-----------|
| C | 2.953448  | 1.605512  | 0.079413  |
| C | 1.631301  | 2.009865  | 0.103577  |
| C | 1.194771  | 3.346921  | -0.139093 |
| C | -1.160165 | 2.663916  | -0.091259 |
| C | -0.13449  | 3.666728  | -0.196924 |
| C | -2.545938 | 2.977957  | -0.218045 |
| C | 2.437583  | -0.811962 | 0.08283   |
| C | 3.355057  | 0.245085  | 0.033471  |
| C | 1.028548  | -0.49329  | 0.404131  |
| C | 0.598719  | 1.009198  | 0.406824  |
| C | -1.770845 | 0.284449  | 0.132551  |
| C | -0.812745 | 1.319228  | 0.132905  |
| C | -3.147931 | 0.62651   | -0.007186 |
| C | -3.506131 | 1.98996   | -0.149535 |
| C | 1.755941  | -3.157894 | -0.120613 |
| C | 2.736774  | -2.203747 | -0.088199 |
| C | 0.357416  | -2.833889 | -0.05595  |
| C | -0.021685 | -1.492945 | 0.140926  |
| C | -2.375888 | -2.124167 | 0.014549  |
| C | -1.382881 | -1.10843  | 0.136107  |
| C | -3.753    | -1.733594 | -0.024455 |
| C | -4.121199 | -0.409701 | -0.037528 |
| C | -0.653521 | -3.823409 | -0.170536 |
| C | -1.983705 | -3.480277 | -0.112363 |
| H | -0.441492 | 4.691683  | -0.371505 |
| H | -4.558763 | 2.251333  | -0.246369 |
| H | 1.948097  | 4.117227  | -0.283033 |
| H | 3.733833  | 2.354129  | -0.020712 |

|   |           |           |           |
|---|-----------|-----------|-----------|
| H | 3.772684  | -2.520852 | -0.150479 |
| H | 2.0337    | -4.203228 | -0.228166 |
| H | -0.361434 | -4.862163 | -0.301271 |
| H | -2.753064 | -4.239786 | -0.192745 |
| H | -5.173738 | -0.140687 | -0.111784 |
| O | -2.852805 | 4.295084  | -0.405141 |
| O | -4.659401 | -2.752641 | -0.08592  |
| O | 5.67043   | 0.697936  | 0.417558  |
| O | 5.21965   | -0.873611 | -1.09167  |
| O | 0.827586  | 0.258551  | 1.607934  |
| C | 4.835207  | 0.051176  | -0.165653 |
| H | -3.815535 | 4.388416  | -0.477032 |
| H | -5.552792 | -2.377758 | -0.132279 |
| H | 4.436974  | -1.200067 | -1.56639  |

**E= -1335.9976363 (Hartree)**

**O-A-C2**

|   | X         | Y         | Z         |
|---|-----------|-----------|-----------|
| C | 2.941804  | 1.624718  | 0.068696  |
| C | 1.614595  | 2.016531  | 0.080294  |
| C | 1.167588  | 3.33856   | -0.207403 |
| C | -1.194789 | 2.652572  | -0.105672 |
| C | -0.165589 | 3.645258  | -0.264942 |
| C | -2.59198  | 2.971019  | -0.190692 |
| C | 2.447534  | -0.795741 | 0.090762  |
| C | 3.356937  | 0.269474  | 0.040651  |
| C | 1.034912  | -0.488635 | 0.404284  |
| C | 0.58822   | 1.015535  | 0.396718  |
| C | -1.770838 | 0.264294  | 0.127751  |
| C | -0.827738 | 1.31168   | 0.123599  |
| C | -3.151506 | 0.59371   | -0.012771 |
| C | -3.52735  | 1.951299  | -0.125403 |
| C | 1.787471  | -3.147596 | -0.110493 |
| C | 2.75998   | -2.184514 | -0.07566  |
| C | 0.386599  | -2.836127 | -0.052235 |
| C | -0.005175 | -1.497682 | 0.142768  |
| C | -2.35235  | -2.1504   | 0.008804  |

|   |           |           |           |
|---|-----------|-----------|-----------|
| C | -1.369523 | -1.124449 | 0.132717  |
| C | -3.733142 | -1.773127 | -0.034383 |
| C | -4.113838 | -0.45338  | -0.045968 |
| C | -0.614654 | -3.83497  | -0.170066 |
| C | -1.947821 | -3.502751 | -0.116956 |
| H | -0.454397 | 4.66052   | -0.517625 |
| H | -4.58586  | 2.195912  | -0.190421 |
| H | 1.912325  | 4.106887  | -0.39848  |
| H | 3.714554  | 2.380133  | -0.039835 |
| H | 3.798852  | -2.492756 | -0.132772 |
| H | 2.075125  | -4.190618 | -0.215294 |
| H | -0.312727 | -4.871069 | -0.299715 |
| H | -2.71058  | -4.268628 | -0.200312 |
| H | -5.16889  | -0.194288 | -0.120928 |
| O | -4.629894 | -2.801109 | -0.100098 |
| O | 5.665698  | 0.746503  | 0.435931  |
| O | 5.238805  | -0.837719 | -1.066889 |
| O | 0.824613  | 0.273752  | 1.599316  |
| C | 4.839853  | 0.088435  | -0.148199 |
| H | -5.525904 | -2.433406 | -0.15289  |
| H | 4.461946  | -1.174264 | -1.544166 |
| N | -2.988481 | 4.295986  | -0.389883 |
| H | -3.981791 | 4.449557  | -0.26303  |
| H | -2.452254 | 4.986432  | 0.121374  |

**E= -1316.1337295 (Hartree)**

**DOX/A-C2**

|   | X         | Y         | Z        |
|---|-----------|-----------|----------|
| C | -6.55652  | -3.53434  | 1.002816 |
| C | -5.372517 | -2.749335 | 0.915096 |
| C | -4.158865 | -3.127332 | 1.548125 |
| C | -3.014172 | -1.150016 | 0.686595 |
| C | -3.026599 | -2.357812 | 1.442097 |
| C | -1.82852  | -0.338533 | 0.534365 |
| C | -7.792938 | -1.912503 | -0.32828 |
| C | -7.722333 | -3.133387 | 0.401923 |
| C | -6.623937 | -1.110951 | -0.4336  |

|   |           |           |           |
|---|-----------|-----------|-----------|
| C | -5.40646  | -1.530272 | 0.183409  |
| C | -4.29232  | 0.500877  | -0.653761 |
| C | -4.227761 | -0.726422 | 0.071244  |
| C | -3.122866 | 1.304056  | -0.754714 |
| C | -1.920988 | 0.862137  | -0.15969  |
| C | -9.072271 | -0.271818 | -1.621162 |
| C | -8.997927 | -1.461139 | -0.924298 |
| C | -7.895067 | 0.541355  | -1.77397  |
| C | -6.684167 | 0.116913  | -1.159737 |
| C | -5.550425 | 2.145873  | -1.993429 |
| C | -5.508573 | 0.922318  | -1.268155 |
| C | -4.366098 | 2.933466  | -2.078226 |
| C | -3.200379 | 2.530882  | -1.481267 |
| C | -7.89627  | 1.753908  | -2.518941 |
| C | -6.765858 | 2.528301  | -2.618669 |
| H | -1.027636 | 1.471109  | -0.267202 |
| H | -4.139884 | -4.041744 | 2.137153  |
| H | -6.522706 | -4.466221 | 1.56301   |
| H | -8.617556 | -3.746054 | 0.481618  |
| H | -9.893041 | -2.070763 | -0.811314 |
| H | -8.793811 | 2.059303  | -3.047726 |
| H | -6.788128 | 3.449842  | -3.196104 |
| H | -4.401716 | 3.868118  | -2.633711 |
| H | -2.305645 | 3.144393  | -1.560507 |
| N | -10.26934 | 0.133307  | -2.230426 |
| H | -10.45411 | 1.1277    | -2.165152 |
| H | -11.07564 | -0.392474 | -1.912643 |
| H | -2.138413 | -2.675547 | 1.976934  |
| N | -0.60013  | -0.751947 | 1.014064  |
| H | -0.551456 | -1.557869 | 1.621311  |
| H | 0.061576  | -0.016714 | 1.249085  |
| C | 1.438095  | 6.987297  | 1.373381  |
| C | 2.332462  | 6.343974  | 0.523442  |
| C | 2.431497  | 4.949348  | 0.548201  |
| C | 1.612895  | 4.171813  | 1.397307  |
| C | 0.722581  | 4.840729  | 2.267309  |
| C | 0.651378  | 6.239392  | 2.247051  |
| H | 1.363375  | 8.07107   | 1.369097  |
| H | 2.970623  | 6.897503  | -0.155966 |
| H | -0.024012 | 6.723294  | 2.946367  |
| C | 3.683996  | 2.864051  | -0.176536 |

|   |           |           |           |
|---|-----------|-----------|-----------|
| C | 4.732755  | 2.272944  | -0.907858 |
| C | 5.035762  | 0.899612  | -0.737089 |
| C | 4.309853  | 0.154734  | 0.184479  |
| C | 3.206302  | 0.722962  | 0.886276  |
| C | 2.885891  | 2.075497  | 0.701837  |
| C | 1.673609  | 2.680041  | 1.322424  |
| C | 3.438048  | 4.3022    | -0.326722 |
| C | 6.159102  | 0.318844  | -1.563845 |
| C | 6.16963   | -1.221674 | -1.595995 |
| C | 5.982948  | -1.747031 | -0.159864 |
| C | 4.645744  | -1.299641 | 0.431083  |
| H | 7.124598  | 0.673503  | -1.180657 |
| H | 6.036194  | -2.842256 | -0.141909 |
| O | -0.005945 | 4.176087  | 3.211123  |
| O | 4.088962  | 4.991476  | -1.137196 |
| O | 0.726681  | 1.998274  | 1.705525  |
| O | 2.49868   | 0.003598  | 1.784201  |
| O | 5.489074  | 2.956788  | -1.780796 |
| H | 2.587198  | -0.963269 | 1.662852  |
| H | 5.141694  | 3.891381  | -1.779306 |
| C | -1.366374 | 3.876474  | 2.870568  |
| H | -1.811198 | 3.449924  | 3.771482  |
| H | -1.910395 | 4.788772  | 2.592163  |
| H | -1.409732 | 3.145337  | 2.059313  |
| O | 8.568697  | -1.34104  | -1.594287 |
| C | 7.526954  | -1.704467 | -2.117714 |
| C | 7.572324  | -2.665964 | -3.291844 |
| H | 6.953781  | -3.543731 | -3.049998 |
| H | 7.076583  | -2.182877 | -4.149038 |
| O | 8.890646  | -3.035778 | -3.590482 |
| H | 9.450238  | -2.522367 | -2.975882 |
| O | 5.17498   | -1.738985 | -2.474543 |
| H | 4.346773  | -1.842871 | -1.974099 |
| O | 3.5436    | -2.060228 | -0.165655 |
| C | 3.153167  | -3.223211 | 0.511581  |
| C | 2.007105  | -3.86167  | -0.257314 |
| C | 1.437324  | -5.052526 | 0.526401  |
| H | 1.233292  | -3.097619 | -0.391042 |
| C | 2.248903  | -3.891426 | 2.641151  |
| C | 1.078683  | -4.622113 | 1.971406  |
| O | 2.722242  | -2.817693 | 1.806204  |

|   |           |           |           |
|---|-----------|-----------|-----------|
| O | -0.064267 | -3.790896 | 1.942482  |
| N | 0.19435   | -5.508088 | -0.109037 |
| C | 1.904433  | -3.290596 | 3.994913  |
| H | 2.775731  | -2.778804 | 4.414152  |
| H | 1.084757  | -2.575063 | 3.897075  |
| H | 1.595761  | -4.079148 | 4.688977  |
| H | -0.030074 | -6.462425 | 0.166497  |
| H | 0.268563  | -5.495646 | -1.123672 |
| H | -0.583623 | -4.123637 | 1.17728   |
| H | 2.35862   | -4.180962 | -1.24595  |
| H | 4.003448  | -3.919332 | 0.632975  |
| H | 2.205528  | -5.842644 | 0.585048  |
| H | 0.87655   | -5.529674 | 2.569377  |
| H | 3.070421  | -4.619291 | 2.754138  |
| H | 6.079462  | 0.694918  | -2.588738 |
| H | 4.642674  | -1.497078 | 1.507905  |
| H | 6.802962  | -1.370737 | 0.4612    |

**E= -2961.1364089 (Hartree)**

**DOX/A-C3**

|   | X         | Y         | Z         |
|---|-----------|-----------|-----------|
| C | 4.692873  | -3.649533 | -1.022062 |
| C | 3.448247  | -3.809631 | -0.403844 |
| C | 3.031561  | -5.057864 | 0.173607  |
| C | 0.889947  | -4.095884 | 0.846339  |
| C | 1.812844  | -5.194559 | 0.766528  |
| C | -0.368342 | -4.217647 | 1.444794  |
| C | 6.717948  | -1.067847 | -2.785184 |
| C | 6.36057   | -2.255651 | -2.219066 |
| C | 4.19698   | -1.309973 | -1.54338  |
| C | 5.085057  | -2.43043  | -1.590772 |
| C | 2.931778  | -1.449301 | -0.908549 |
| C | 2.550991  | -2.696282 | -0.341998 |
| C | 0.390555  | -1.729886 | 0.355127  |
| C | 1.27881   | -2.837247 | 0.286725  |
| C | -0.877326 | -1.868915 | 0.983855  |
| C | -1.259211 | -3.13807  | 1.522536  |

|   |           |           |           |
|---|-----------|-----------|-----------|
| C | -3.408595 | -2.194097 | 2.183978  |
| C | -2.562124 | -3.260658 | 2.105272  |
| C | 6.184875  | 1.296357  | -3.404044 |
| C | 5.83986   | 0.06897   | -2.782583 |
| C | 3.681589  | 1.040936  | -2.065537 |
| C | 4.576259  | -0.060868 | -2.126173 |
| C | 2.415577  | 0.905301  | -1.418523 |
| C | 2.035132  | -0.338428 | -0.84876  |
| C | -0.116116 | 0.630091  | -0.143587 |
| C | 0.774321  | -0.474668 | -0.209431 |
| C | -1.381739 | 0.494797  | 0.503557  |
| C | -1.765768 | -0.751728 | 1.067352  |
| C | -3.907846 | 0.223386  | 1.820544  |
| C | -3.035622 | -0.895267 | 1.701719  |
| C | 5.674917  | 3.708728  | -3.824929 |
| C | 5.32676   | 2.419906  | -3.29416  |
| C | 3.171986  | 3.398378  | -2.561654 |
| C | 4.064929  | 2.284613  | -2.634935 |
| C | 1.908212  | 3.2624    | -1.923112 |
| C | 1.525117  | 2.008956  | -1.354729 |
| C | -0.626887 | 2.986962  | -0.642306 |
| C | 0.265325  | 1.873791  | -0.712194 |
| C | -1.885449 | 2.851605  | 0.008023  |
| C | -2.272141 | 1.599008  | 0.581158  |
| C | -4.358889 | 2.642914  | 1.348387  |
| C | -3.530821 | 1.472678  | 1.254058  |
| C | 4.827843  | 4.773971  | -3.744669 |
| C | 2.653037  | 5.740965  | -3.043974 |
| C | 3.541501  | 4.660931  | -3.124039 |
| C | 1.403928  | 5.625703  | -2.424041 |
| C | 1.020243  | 4.370333  | -1.853609 |
| C | -1.134791 | 5.351943  | -1.133658 |
| C | -0.24574  | 4.233517  | -1.210775 |
| C | -2.36552  | 5.201171  | -0.485713 |
| C | -2.755522 | 3.984324  | 0.08881   |
| C | -3.997064 | 3.831635  | 0.78605   |
| C | 0.486384  | 6.727471  | -2.334872 |
| C | -0.722411 | 6.596962  | -1.720268 |
| H | -5.296469 | 2.601938  | 1.891458  |
| H | -4.400543 | -2.329961 | 2.597865  |
| H | -2.874788 | -4.23493  | 2.473636  |

|   |           |           |           |
|---|-----------|-----------|-----------|
| H | -0.666786 | -5.178087 | 1.860225  |
| H | 1.514695  | -6.148641 | 1.194792  |
| H | 3.716     | -5.901496 | 0.124117  |
| H | 5.37577   | -4.495647 | -1.065452 |
| H | 7.052091  | -3.094669 | -2.22982  |
| H | 7.713343  | -0.978107 | -3.209615 |
| H | 6.654678  | 3.862414  | -4.267257 |
| H | 5.125631  | 5.739123  | -4.147226 |
| H | 2.944368  | 6.696816  | -3.474758 |
| H | 0.780908  | 7.679019  | -2.771228 |
| H | -1.401978 | 7.443905  | -1.660173 |
| H | -3.036544 | 6.05521   | -0.417513 |
| H | -4.648063 | 4.697732  | 0.879734  |
| N | -5.130135 | 0.040763  | 2.45575   |
| H | -5.759473 | 0.832656  | 2.484276  |
| H | -5.097002 | -0.446688 | 3.349617  |
| N | 7.399689  | 1.412545  | -4.087455 |
| H | 7.404706  | 2.123865  | -4.806518 |
| H | 7.749101  | 0.541409  | -4.464597 |
| C | -1.439349 | -3.942808 | 8.364051  |
| C | -2.371581 | -4.773385 | 7.749963  |
| C | -3.366372 | -4.219167 | 6.93839   |
| C | -3.426359 | -2.827764 | 6.698768  |
| C | -2.476038 | -1.997391 | 7.33505   |
| C | -1.501578 | -2.565304 | 8.165331  |
| H | -0.671024 | -4.364044 | 9.006195  |
| H | -2.356924 | -5.848013 | 7.891966  |
| H | -0.804338 | -1.895315 | 8.659514  |
| C | -5.529304 | -4.552978 | 5.653251  |
| C | -6.554328 | -5.408738 | 5.204456  |
| C | -7.71564  | -4.872483 | 4.595108  |
| C | -7.849518 | -3.493317 | 4.487785  |
| C | -6.797777 | -2.617853 | 4.888045  |
| C | -5.629183 | -3.145754 | 5.455636  |
| C | -4.4544   | -2.27989  | 5.762482  |
| C | -4.371332 | -5.131569 | 6.34304   |
| C | -8.766816 | -5.841363 | 4.105983  |
| C | -9.782636 | -5.209436 | 3.133994  |
| C | -10.26059 | -3.869055 | 3.723882  |
| C | -9.102338 | -2.88618  | 3.895681  |
| H | -9.309239 | -6.265899 | 4.960493  |



|   |           |           |           |
|---|-----------|-----------|-----------|
| H | -11.02371 | -3.416126 | 3.079654  |
| O | -2.524271 | -0.63569  | 7.249803  |
| O | -4.24513  | -6.365495 | 6.475259  |
| O | -4.298767 | -1.185329 | 5.228684  |
| O | -6.922029 | -1.276377 | 4.791439  |
| O | -6.494778 | -6.744191 | 5.327229  |
| H | -7.622346 | -0.993959 | 4.169111  |
| H | -5.625159 | -6.94519  | 5.771838  |
| C | -1.69505  | -0.041449 | 6.241662  |
| H | -1.815285 | 1.037382  | 6.355661  |
| H | -0.641657 | -0.310581 | 6.394917  |
| H | -2.023356 | -0.34462  | 5.244638  |
| O | -11.60725 | -6.522506 | 3.979723  |
| C | -10.99272 | -6.13923  | 2.99653   |
| C | -11.44439 | -6.572209 | 1.613024  |
| H | -11.61767 | -5.672466 | 1.003095  |
| H | -10.60682 | -7.099786 | 1.12913   |
| O | -12.59397 | -7.370451 | 1.684581  |
| H | -12.77475 | -7.481292 | 2.638239  |
| O | -9.233529 | -5.040667 | 1.830721  |
| H | -8.791234 | -4.174796 | 1.792093  |
| O | -8.693668 | -2.34362  | 2.596629  |
| C | -9.300369 | -1.142626 | 2.204702  |
| C | -8.733674 | -0.738487 | 0.852045  |
| C | -9.243243 | 0.65438   | 0.455324  |
| H | -7.64181  | -0.727485 | 0.941486  |
| C | -9.48525  | 1.144883  | 2.940467  |
| C | -8.977953 | 1.672382  | 1.593612  |
| O | -8.968207 | -0.17472  | 3.195334  |
| O | -7.592695 | 1.948785  | 1.666168  |
| N | -8.510697 | 1.129613  | -0.725932 |
| C | -9.102039 | 2.016361  | 4.126228  |
| H | -9.490951 | 1.586411  | 5.053997  |
| H | -8.01544  | 2.100947  | 4.201025  |
| H | -9.520619 | 3.020807  | 4.005113  |
| H | -9.032615 | 1.855523  | -1.213453 |
| H | -8.347679 | 0.376726  | -1.390576 |
| H | -7.289884 | 1.888561  | 0.733026  |
| H | -9.016325 | -1.482263 | 0.097157  |
| H | -10.40111 | -1.242342 | 2.176047  |
| H | -10.33331 | 0.601812  | 0.291763  |

|   |           |           |          |
|---|-----------|-----------|----------|
| H | -9.540059 | 2.598519  | 1.374167 |
| H | -10.58374 | 1.069456  | 2.871206 |
| H | -8.2734   | -6.682008 | 3.607891 |
| H | -9.431883 | -2.048716 | 4.51886  |
| H | -10.72664 | -4.060765 | 4.696415 |

E= -4108.1827921 (Hartree)

**DOX/A-C4**

|   | X         | Y         | Z        |
|---|-----------|-----------|----------|
| C | -8.265826 | -6.858264 | 0.698539 |
| C | -7.949672 | -8.189029 | 0.659781 |
| C | -6.929621 | -2.084287 | 0.888863 |
| C | -6.607236 | -3.463457 | 0.864763 |
| C | -7.594746 | -4.476277 | 0.81754  |
| C | -5.885583 | -6.218858 | 0.807272 |
| C | -7.269535 | -5.829049 | 0.786521 |
| C | -5.537847 | -7.596098 | 0.780589 |
| C | -6.555176 | -8.613275 | 0.728037 |
| C | -4.826985 | -10.35953 | 0.780752 |
| C | -6.183528 | -9.951561 | 0.749985 |
| C | -4.446061 | -11.72281 | 0.784159 |
| C | -5.301542 | 1.262394  | 0.981935 |
| C | -6.271259 | 0.310559  | 0.947885 |
| C | -4.564352 | -1.47291  | 0.947884 |
| C | -5.952105 | -1.096741 | 0.927849 |
| C | -4.213508 | -2.84898  | 0.929287 |
| C | -5.226651 | -3.845475 | 0.884834 |
| C | -3.500136 | -5.607544 | 0.880405 |
| C | -4.875096 | -5.224291 | 0.861465 |
| C | -3.148655 | -6.980492 | 0.865637 |
| C | -4.168757 | -7.979956 | 0.813937 |
| C | -2.437167 | -9.740317 | 0.837158 |
| C | -3.807048 | -9.356299 | 0.808204 |
| C | -2.080498 | -11.11512 | 0.833477 |
| C | -3.112802 | -12.11592 | 0.805661 |
| C | -1.403615 | -13.86667 | 0.820515 |
| C | -2.712882 | -13.50228 | 0.800353 |

|   |           |           |          |
|---|-----------|-----------|----------|
| C | -2.894594 | 1.875357  | 1.034036 |
| C | -3.900587 | 0.916668  | 1.00174  |
| C | -2.181972 | -0.856145 | 1.005453 |
| C | -3.550575 | -0.478342 | 0.985692 |
| C | -1.826881 | -2.239153 | 0.99231  |
| C | -2.838053 | -3.231013 | 0.946864 |
| C | -1.116974 | -4.991141 | 0.949494 |
| C | -2.48437  | -4.610358 | 0.9324   |
| C | -0.762826 | -6.369982 | 0.94041  |
| C | -1.776344 | -7.363205 | 0.887799 |
| C | -0.053318 | -9.121938 | 0.903233 |
| C | -1.418552 | -8.741475 | 0.879036 |
| C | 0.303364  | -10.50462 | 0.894825 |
| C | -0.711845 | -11.49658 | 0.858636 |
| C | 0.999248  | -13.24051 | 0.874415 |
| C | -0.344788 | -12.88704 | 0.850818 |
| C | -0.489153 | 2.494667  | 1.08414  |
| C | -1.522169 | 1.526264  | 1.053969 |
| C | 0.205374  | -0.241698 | 1.063876 |
| C | -1.165389 | 0.138301  | 1.042143 |
| C | 0.561404  | -1.624519 | 1.056225 |
| C | -0.455189 | -2.620312 | 1.010942 |
| C | 1.270593  | -4.376786 | 1.021998 |
| C | -0.10091  | -3.995071 | 1.002567 |
| C | 1.624747  | -5.755541 | 1.014859 |
| C | 0.608806  | -6.75156  | 0.959671 |
| C | 2.335013  | -8.50739  | 0.974896 |
| C | 0.963238  | -8.126256 | 0.951482 |
| C | 2.690362  | -9.890201 | 0.963131 |
| C | 1.67423   | -10.88455 | 0.920799 |
| C | 3.403845  | -12.62147 | 0.936404 |
| C | 2.031689  | -12.27226 | 0.909398 |
| C | 1.915108  | 3.120438  | 1.13378  |
| C | 0.85513   | 2.141161  | 1.104246 |
| C | 2.589469  | 0.368463  | 1.12071  |
| C | 1.221004  | 0.750176  | 1.096809 |
| C | 2.945185  | -1.00663  | 1.12075  |
| C | 1.926373  | -2.005235 | 1.080409 |
| C | 3.656311  | -3.766476 | 1.104157 |
| C | 2.284072  | -3.383666 | 1.07525  |
| C | 4.00795   | -5.13928  | 1.094954 |

|   |           |           |          |
|---|-----------|-----------|----------|
| C | 2.992223  | -6.136269 | 1.037643 |
| C | 4.721689  | -7.897279 | 1.053721 |
| C | 3.345985  | -7.515614 | 1.026018 |
| C | 5.072242  | -9.273527 | 1.03778  |
| C | 4.059051  | -10.26788 | 0.991293 |
| C | 5.810193  | -12.00845 | 1.006998 |
| C | 4.409376  | -11.66292 | 0.976467 |
| C | 3.224823  | 2.756688  | 1.152561 |
| C | 4.954631  | 0.973747  | 1.166322 |
| C | 3.622183  | 1.369165  | 1.145762 |
| C | 5.334978  | -0.389807 | 1.180306 |
| C | 4.314368  | -1.391508 | 1.155026 |
| C | 6.045073  | -3.150646 | 1.209731 |
| C | 4.676112  | -2.767397 | 1.160082 |
| C | 6.392887  | -4.527686 | 1.189945 |
| C | 5.383072  | -5.522092 | 1.126017 |
| C | 7.115332  | -7.281267 | 1.144068 |
| C | 5.734087  | -6.901009 | 1.107577 |
| C | 7.436932  | -8.66137  | 1.121865 |
| C | 6.46003   | -9.649001 | 1.070733 |
| C | 6.779261  | -11.05636 | 1.051362 |
| C | 6.691001  | -0.797226 | 1.226846 |
| C | 8.46151   | -2.549083 | 1.366199 |
| C | 7.062153  | -2.134283 | 1.27184  |
| C | 8.773353  | -3.886584 | 1.334426 |
| C | 7.7788    | -4.913373 | 1.230544 |
| C | 8.101701  | -6.268796 | 1.204667 |
| H | 4.004768  | 3.514393  | 1.178775 |
| H | 5.733726  | 1.732696  | 1.17683  |
| H | 7.456245  | -0.029901 | 1.217883 |
| H | 9.812454  | -4.190353 | 1.439043 |
| H | 9.148506  | -6.563921 | 1.240414 |
| H | 8.484939  | -8.953352 | 1.149985 |
| H | 7.827928  | -11.34358 | 1.075393 |
| H | -3.492676 | -14.25988 | 0.779577 |
| H | -5.224122 | -12.48335 | 0.766534 |
| H | -6.943197 | -10.72732 | 0.775849 |
| H | -9.309592 | -6.55483  | 0.641169 |
| H | -8.642039 | -4.181917 | 0.799075 |
| H | -7.977844 | -1.792794 | 0.873135 |
| H | -7.319979 | 0.597821  | 0.933315 |

|   |           |           |           |
|---|-----------|-----------|-----------|
| H | -5.568894 | 2.316336  | 0.995289  |
| H | -3.165574 | 2.92906   | 1.044748  |
| H | -0.76136  | 3.548076  | 1.091504  |
| H | 1.63959   | 4.172296  | 1.140821  |
| H | 6.077823  | -13.06233 | 0.994428  |
| H | 3.674731  | -13.67515 | 0.926258  |
| H | 1.271408  | -14.29389 | 0.867009  |
| H | -1.127752 | -14.91843 | 0.815212  |
| N | 9.439962  | -1.565322 | 1.429011  |
| N | -8.938277 | -9.178323 | 0.609206  |
| H | -9.861869 | -8.8132   | 0.405901  |
| H | -8.7224   | -9.953232 | -0.007898 |
| H | 9.261622  | -0.789223 | 2.064235  |
| H | 10.384714 | -1.927343 | 1.524755  |
| C | 5.378394  | 3.904982  | 5.755428  |
| C | 5.779     | 4.419816  | 4.526181  |
| C | 6.783676  | 3.774757  | 3.798294  |
| C | 7.379245  | 2.583061  | 4.27015   |
| C | 6.964305  | 2.0757    | 5.521341  |
| C | 5.976953  | 2.748868  | 6.251631  |
| H | 4.608318  | 4.407712  | 6.333469  |
| H | 5.338872  | 5.32228   | 4.117511  |
| H | 5.701957  | 2.347916  | 7.222616  |
| C | 8.422531  | 3.847907  | 1.863779  |
| C | 8.946524  | 4.522962  | 0.743576  |
| C | 10.142846 | 4.070496  | 0.132912  |
| C | 10.801307 | 2.969973  | 0.668085  |
| C | 10.251336 | 2.239732  | 1.762305  |
| C | 9.058441  | 2.671987  | 2.357604  |
| C | 8.3855    | 1.874506  | 3.422485  |
| C | 7.22323   | 4.380285  | 2.518932  |
| C | 10.653525 | 4.832632  | -1.068309 |
| C | 11.718168 | 4.070357  | -1.881369 |
| C | 12.749355 | 3.466806  | -0.90828  |
| C | 12.09751  | 2.48048   | 0.060115  |
| H | 11.073675 | 5.793482  | -0.743872 |
| H | 13.544163 | 2.954525  | -1.46359  |
| O | 7.562738  | 0.992918  | 6.09883   |
| O | 6.600282  | 5.352172  | 2.043969  |
| O | 8.592228  | 0.67215   | 3.56406   |
| O | 10.894825 | 1.177649  | 2.291968  |

|   |           |           |           |
|---|-----------|-----------|-----------|
| O | 8.364016  | 5.607409  | 0.208691  |
| H | 11.516828 | 0.750873  | 1.668069  |
| H | 7.540198  | 5.776124  | 0.743569  |
| C | 6.903041  | -0.265196 | 5.901754  |
| H | 7.477697  | -0.995277 | 6.474633  |
| H | 5.873488  | -0.230261 | 6.281513  |
| H | 6.908109  | -0.540277 | 4.844055  |
| O | 12.973243 | 6.060776  | -2.361491 |
| C | 12.443452 | 5.054284  | -2.805828 |
| C | 12.519627 | 4.759635  | -4.293219 |
| H | 12.955497 | 3.758263  | -4.430444 |
| H | 11.490635 | 4.68904   | -4.680875 |
| O | 13.265414 | 5.73831   | -4.963839 |
| H | 13.50259  | 6.396981  | -4.282489 |
| O | 11.134537 | 3.070728  | -2.710806 |
| H | 11.043245 | 2.254547  | -2.188643 |
| O | 11.750133 | 1.238204  | -0.635404 |
| C | 12.700164 | 0.210623  | -0.597065 |
| C | 12.164217 | -0.960297 | -1.406881 |
| C | 13.078175 | -2.184826 | -1.256027 |
| H | 11.162642 | -1.188412 | -1.026309 |
| C | 13.778557 | -1.236838 | 0.998682  |
| C | 13.329452 | -2.492338 | 0.242166  |
| O | 12.855465 | -0.154895 | 0.771153  |
| O | 12.149068 | -3.015893 | 0.820535  |
| N | 12.417361 | -3.36381  | -1.83222  |
| C | 13.887611 | -1.430678 | 2.50309   |
| H | 14.201669 | -0.498974 | 2.982815  |
| H | 12.926235 | -1.739175 | 2.920593  |
| H | 14.627587 | -2.205493 | 2.728832  |
| H | 13.095379 | -4.090227 | -2.055546 |
| H | 11.929066 | -3.131594 | -2.694194 |
| H | 11.721622 | -3.502854 | 0.081269  |
| H | 12.079194 | -0.669582 | -2.461033 |
| H | 13.680087 | 0.557759  | -0.973377 |
| H | 14.05109  | -1.964502 | -1.72752  |
| H | 14.149225 | -3.229783 | 0.317215  |
| H | 14.758546 | -0.938077 | 0.589158  |
| H | 9.811243  | 5.072664  | -1.724896 |
| H | 12.805791 | 2.232861  | 0.857522  |
| H | 13.217135 | 4.280152  | -0.343053 |

---

E= -5712.6471891 (Hartree)

**DOX/O-C2**

|   | X        | Y         | Z         |
|---|----------|-----------|-----------|
| C | 1.917886 | 2.641478  | -0.296451 |
| C | 3.211024 | 2.679723  | 0.202952  |
| C | 3.628913 | 3.504626  | 1.289961  |
| C | 5.858751 | 2.483626  | 1.308012  |
| C | 4.900085 | 3.438837  | 1.794689  |
| C | 7.165504 | 2.36139   | 1.867245  |
| C | 2.279351 | 0.580714  | -1.61038  |
| C | 1.455749 | 1.616159  | -1.157138 |
| C | 3.732807 | 0.71243   | -1.408104 |
| C | 4.232359 | 1.833753  | -0.426018 |
| C | 6.379679 | 0.589237  | -0.187443 |
| C | 5.519425 | 1.620418  | 0.249611  |
| C | 7.676243 | 0.486742  | 0.396247  |
| C | 8.05154  | 1.41231   | 1.402076  |
| C | 2.703837 | -1.590761 | -2.653618 |
| C | 1.837241 | -0.592202 | -2.299272 |
| C | 4.094247 | -1.573483 | -2.284496 |
| C | 4.602487 | -0.459972 | -1.58844  |
| C | 6.786614 | -1.535203 | -1.415363 |
| C | 5.929712 | -0.440925 | -1.097707 |
| C | 8.117947 | -1.535616 | -0.889367 |
| C | 8.542191 | -0.563937 | -0.015133 |
| C | 4.973849 | -2.645893 | -2.588509 |
| C | 6.289771 | -2.613859 | -2.190059 |
| H | 5.196366 | 4.08549   | 2.612947  |
| H | 9.04532  | 1.339326  | 1.841579  |
| H | 2.907373 | 4.196475  | 1.717266  |
| H | 1.187367 | 3.356232  | 0.074057  |
| H | 0.785484 | -0.686341 | -2.54788  |
| H | 2.330485 | -2.456896 | -3.193884 |
| H | 4.592691 | -3.496284 | -3.14823  |
| H | 6.959211 | -3.431259 | -2.433376 |
| H | 9.544765 | -0.615141 | 0.407167  |
| O | 7.477972 | 3.232674  | 2.872731  |

|   |           |           |           |
|---|-----------|-----------|-----------|
| O | 8.912811  | -2.577647 | -1.276652 |
| O | -0.46426  | 2.612821  | -2.156915 |
| O | -0.789295 | 0.656837  | -1.159769 |
| O | 4.313441  | 1.943678  | -1.851749 |
| C | -0.003376 | 1.677209  | -1.533181 |
| H | 8.38405   | 3.056694  | 3.170535  |
| H | 9.777779  | -2.488051 | -0.847112 |
| H | -0.370882 | 0.061944  | -0.485504 |
| C | 0.763108  | -6.222859 | 1.516933  |
| C | -0.505027 | -6.030159 | 0.975272  |
| C | -0.996777 | -4.732583 | 0.807731  |
| C | -0.209715 | -3.607737 | 1.140986  |
| C | 1.063698  | -3.818561 | 1.710918  |
| C | 1.532833  | -5.124865 | 1.896779  |
| H | 1.146124  | -7.22884  | 1.663543  |
| H | -1.135239 | -6.865084 | 0.690269  |
| H | 2.504296  | -5.257714 | 2.363569  |
| C | -2.975828 | -3.220196 | 0.349471  |
| C | -4.342714 | -3.066273 | 0.05301   |
| C | -4.965954 | -1.799319 | 0.192628  |
| C | -4.221784 | -0.724669 | 0.662562  |
| C | -2.821522 | -0.848769 | 0.905159  |
| C | -2.194968 | -2.087994 | 0.724306  |
| C | -0.722515 | -2.24372  | 0.822635  |
| C | -2.37932  | -4.557314 | 0.29746   |
| C | -6.432466 | -1.69465  | -0.155389 |
| C | -6.930031 | -0.243855 | -0.308647 |
| C | -6.401247 | 0.587731  | 0.876573  |
| C | -4.872564 | 0.620937  | 0.896468  |
| H | -7.033265 | -2.198915 | 0.612364  |
| H | -6.781943 | 1.614752  | 0.825214  |
| O | 1.807407  | -2.778926 | 2.188297  |
| O | -3.026191 | -5.546751 | -0.099868 |
| O | 0.064208  | -1.324663 | 0.579819  |
| O | -2.092759 | 0.173773  | 1.39477   |
| O | -5.116653 | -4.083531 | -0.356162 |
| H | -2.450169 | 1.057837  | 1.163401  |
| H | -4.527667 | -4.886209 | -0.394641 |
| C | 2.89261   | -2.346584 | 1.356994  |
| H | 3.407503  | -1.56582  | 1.919455  |
| H | 3.589169  | -3.170715 | 1.155009  |



|   |           |           |           |
|---|-----------|-----------|-----------|
| H | 2.512443  | -1.937676 | 0.418122  |
| O | -9.072758 | -0.753004 | 0.653441  |
| C | -8.461454 | -0.228306 | -0.264564 |
| C | -9.22816  | 0.474241  | -1.371088 |
| H | -8.861087 | 1.508954  | -1.450562 |
| H | -8.96562  | -0.006078 | -2.327112 |
| O | -10.60844 | 0.43779   | -1.129324 |
| H | -10.71403 | -0.086012 | -0.311375 |
| O | -6.540395 | 0.317246  | -1.557572 |
| H | -5.670953 | 0.742421  | -1.447916 |
| O | -4.369379 | 1.491695  | -0.164031 |
| C | -4.123888 | 2.82532   | 0.199953  |
| C | -3.634718 | 3.581154  | -1.024599 |
| C | -3.182726 | 4.996245  | -0.631724 |
| H | -2.795585 | 3.02978   | -1.462422 |
| C | -2.726709 | 4.09027   | 1.695155  |
| C | -2.175763 | 4.944338  | 0.544853  |
| O | -3.125024 | 2.791701  | 1.212484  |
| O | -0.940023 | 4.421882  | 0.116911  |
| N | -2.499191 | 5.620461  | -1.768041 |
| C | -1.73025  | 3.861467  | 2.82031   |
| H | -2.177634 | 3.24596   | 3.60671   |
| H | -0.839942 | 3.358495  | 2.436003  |
| H | -1.429127 | 4.819965  | 3.256078  |
| H | -2.479439 | 6.63385   | -1.673638 |
| H | -2.962006 | 5.401738  | -2.646761 |
| H | -0.895568 | 4.583838  | -0.849099 |
| H | -4.442089 | 3.632394  | -1.766125 |
| H | -5.031698 | 3.288498  | 0.630288  |
| H | -4.064435 | 5.567702  | -0.289233 |
| H | -2.04767  | 5.972042  | 0.935643  |
| H | -3.626353 | 4.594976  | 2.087592  |
| H | -6.616765 | -2.232634 | -1.090934 |
| H | -4.529423 | 1.024701  | 1.854287  |
| H | -6.772755 | 0.147205  | 1.808185  |

---

**E= -3264.5407306 (Hartree)**

**DOX/O-A-C2**

|   | X         | Y         | Z         |
|---|-----------|-----------|-----------|
| C | -3.505056 | 0.837271  | -1.41392  |
| C | -2.169544 | 0.852495  | -1.785793 |
| C | -1.573534 | -0.077324 | -2.684293 |
| C | 0.586985  | 1.104011  | -2.604006 |
| C | -0.254559 | 0.025171  | -3.041712 |
| C | 1.969041  | 1.208747  | -2.986204 |
| C | -3.477481 | 3.1128    | -0.441436 |
| C | -4.149427 | 1.927792  | -0.779761 |
| C | -2.002485 | 3.101015  | -0.497158 |
| C | -1.299035 | 1.885313  | -1.214922 |
| C | 0.752557  | 3.275229  | -1.441629 |
| C | 0.042729  | 2.105034  | -1.775079 |
| C | 2.10344   | 3.395383  | -1.885907 |
| C | 2.689227  | 2.333806  | -2.609556 |
| C | -3.338588 | 5.458236  | 0.247389  |
| C | -4.078133 | 4.327867  | 0.017605  |
| C | -1.928375 | 5.528246  | -0.013374 |
| C | -1.257495 | 4.367823  | -0.447961 |
| C | 0.83305   | 5.614908  | -0.603662 |
| C | 0.113394  | 4.398618  | -0.79573  |
| C | 2.214162  | 5.656934  | -0.980372 |
| C | 2.821187  | 4.58925   | -1.595752 |
| C | -1.184755 | 6.724076  | 0.165788  |
| C | 0.164414  | 6.757593  | -0.098167 |
| H | 0.149961  | -0.702231 | -3.73796  |
| H | 3.733353  | 2.416604  | -2.904488 |
| H | -2.179414 | -0.888395 | -3.075786 |
| H | -4.125422 | 0.000513  | -1.723014 |
| H | -5.143248 | 4.352053  | 0.225626  |
| H | -3.834915 | 6.352901  | 0.614855  |
| H | -1.696546 | 7.614881  | 0.520978  |
| H | 0.731653  | 7.669894  | 0.047829  |
| H | 3.861905  | 4.663935  | -1.907692 |
| O | 2.866479  | 6.829194  | -0.722954 |
| O | -6.103726 | 0.760416  | -0.04351  |
| O | -6.443988 | 2.733674  | -0.998775 |
| O | -1.3817   | 2.02061   | 0.207456  |

|   |           |           |           |
|---|-----------|-----------|-----------|
| C | -5.62194  | 1.747141  | -0.560701 |
| H | 3.779032  | 6.756652  | -1.043758 |
| H | -5.921545 | 3.393747  | -1.486029 |
| N | 2.553347  | 0.214547  | -3.76172  |
| H | 3.565758  | 0.248333  | -3.786637 |
| H | 2.241056  | -0.733157 | -3.582551 |
| C | 7.658698  | -0.419607 | 0.466505  |
| C | 6.694246  | -0.85619  | -0.434554 |
| C | 5.385322  | -1.084873 | 0.005726  |
| C | 5.005569  | -0.851116 | 1.345844  |
| C | 6.002579  | -0.418942 | 2.251364  |
| C | 7.313087  | -0.215473 | 1.80059   |
| H | 8.680606  | -0.252656 | 0.137739  |
| H | 6.932051  | -1.044524 | -1.475253 |
| H | 8.054779  | 0.092023  | 2.531787  |
| C | 3.095627  | -2.058544 | -0.491533 |
| C | 2.229566  | -2.707981 | -1.393322 |
| C | 0.98469   | -3.214702 | -0.958683 |
| C | 0.611602  | -3.025432 | 0.365986  |
| C | 1.433254  | -2.292478 | 1.274733  |
| C | 2.696311  | -1.837469 | 0.859115  |
| C | 3.579203  | -1.049702 | 1.771644  |
| C | 4.409093  | -1.618778 | -0.968226 |
| C | 0.148475  | -3.987274 | -1.955138 |
| C | -1.297886 | -4.268723 | -1.50085  |
| C | -1.294266 | -4.670653 | -0.011384 |
| C | -0.710688 | -3.562575 | 0.865263  |
| H | 0.643842  | -4.943117 | -2.168467 |
| H | -2.314486 | -4.895196 | 0.321559  |
| O | 5.777567  | -0.27582  | 3.590985  |
| O | 4.734751  | -1.725711 | -2.173085 |
| O | 3.166695  | -0.554409 | 2.810873  |
| O | 1.052686  | -2.111943 | 2.551837  |
| O | 2.54103   | -2.883342 | -2.698503 |
| H | 0.078089  | -2.065179 | 2.664403  |
| H | 3.47435   | -2.539028 | -2.800025 |
| C | 5.366484  | 1.024507  | 4.029036  |
| H | 5.295773  | 0.962582  | 5.116639  |
| H | 6.1139    | 1.781236  | 3.753823  |
| H | 4.389423  | 1.280283  | 3.613136  |
| O | -1.255174 | -6.494699 | -2.407923 |

|   |           |           |           |
|---|-----------|-----------|-----------|
| C | -1.864578 | -5.441212 | -2.309818 |
| C | -3.22119  | -5.296072 | -2.976648 |
| H | -3.957415 | -4.994559 | -2.215903 |
| H | -3.165353 | -4.453532 | -3.684089 |
| O | -3.600035 | -6.485846 | -3.613069 |
| H | -2.848769 | -7.097711 | -3.487768 |
| O | -2.154168 | -3.153597 | -1.731454 |
| H | -2.080424 | -2.554974 | -0.964551 |
| O | -1.618196 | -2.418236 | 0.89551   |
| C | -2.496493 | -2.355006 | 1.989498  |
| C | -3.459401 | -1.201409 | 1.777548  |
| C | -4.344651 | -1.021811 | 3.018659  |
| H | -2.871803 | -0.294302 | 1.602607  |
| C | -2.430632 | -2.020295 | 4.375059  |
| C | -3.463473 | -0.887946 | 4.28648   |
| O | -1.691497 | -2.142871 | 3.141583  |
| O | -2.810866 | 0.359679  | 4.279289  |
| N | -5.120939 | 0.215634  | 2.886251  |
| C | -1.408136 | -1.822775 | 5.483     |
| H | -0.688248 | -2.647027 | 5.488244  |
| H | -0.875726 | -0.880945 | 5.3328    |
| H | -1.909505 | -1.789731 | 6.45601   |
| H | -5.927902 | 0.199519  | 3.507706  |
| H | -5.472444 | 0.328077  | 1.934615  |
| H | -3.446004 | 0.950723  | 3.820464  |
| H | -4.077393 | -1.386355 | 0.89207   |
| H | -3.033493 | -3.314229 | 2.11304   |
| H | -4.978069 | -1.919618 | 3.133267  |
| H | -4.117056 | -0.984712 | 5.175823  |
| H | -2.982931 | -2.962984 | 4.531452  |
| H | 0.113901  | -3.443528 | -2.904349 |
| H | -0.59095  | -3.930832 | 1.889109  |
| H | -0.699234 | -5.582919 | 0.10746   |

---

**E= -3244.6703471 (Hartree)**

## Cartesian coordinates (Å) for the studied compounds in aqueous

### DOX

|   | X         | Y         | Z         |
|---|-----------|-----------|-----------|
| C | 7.149511  | -0.776444 | -0.127219 |
| C | 6.064313  | -1.597631 | -0.417798 |
| C | 4.763737  | -1.088787 | -0.336549 |
| C | 4.523569  | 0.261537  | 0.003438  |
| C | 5.636673  | 1.074989  | 0.312836  |
| C | 6.931964  | 0.547522  | 0.248404  |
| H | 8.161099  | -1.167754 | -0.176206 |
| H | 6.203021  | -2.636722 | -0.693063 |
| H | 7.762062  | 1.19535   | 0.513433  |
| C | 2.27126   | -1.553683 | -0.301521 |
| C | 1.216895  | -2.484958 | -0.365789 |
| C | -0.099617 | -2.104324 | -0.008306 |
| C | -0.340652 | -0.796345 | 0.391276  |
| C | 0.699017  | 0.182777  | 0.377419  |
| C | 2.012539  | -0.195463 | 0.052223  |
| C | 3.124135  | 0.797892  | 0.002246  |
| C | 3.633623  | -2.01181  | -0.58347  |
| C | -1.16822  | -3.172683 | -0.041889 |
| C | -2.604056 | -2.629919 | 0.081921  |
| C | -2.637602 | -1.558627 | 1.190791  |
| C | -1.722475 | -0.38317  | 0.850245  |
| H | -0.985955 | -3.889632 | 0.768604  |
| H | -3.656949 | -1.186132 | 1.339879  |
| O | 5.494551  | 2.358846  | 0.769921  |
| O | 3.860961  | -3.176711 | -0.976862 |
| O | 2.919363  | 2.006536  | -0.068711 |
| O | 0.456425  | 1.454906  | 0.754758  |
| O | 1.399185  | -3.765231 | -0.736259 |
| H | -0.489314 | 1.71346   | 0.679511  |
| H | 2.371291  | -3.855357 | -0.944183 |
| C | 5.657299  | 3.385082  | -0.219425 |
| H | 5.590776  | 4.3343    | 0.315712  |
| H | 6.637242  | 3.308651  | -0.706011 |
| H | 4.859891  | 3.32537   | -0.965399 |
| O | -3.29815  | -4.506463 | 1.424498  |
| C | -3.547088 | -3.767704 | 0.482545  |
| C | -4.834461 | -3.965661 | -0.297469 |
| H | -5.397143 | -3.020884 | -0.297483 |

|   |           |           |           |
|---|-----------|-----------|-----------|
| H | -4.571619 | -4.163633 | -1.347489 |
| O | -5.595455 | -5.01499  | 0.251963  |
| H | -5.054444 | -5.361941 | 0.9892    |
| O | -3.06688  | -2.113257 | -1.164196 |
| H | -2.932032 | -1.147096 | -1.161663 |
| O | -2.311271 | 0.40158   | -0.236943 |
| C | -3.064758 | 1.515005  | 0.173419  |
| C | -3.857035 | 2.051734  | -1.006049 |
| C | -4.553153 | 3.366351  | -0.62162  |
| H | -3.162185 | 2.228761  | -1.833773 |
| C | -2.707666 | 3.713794  | 1.094272  |
| C | -3.532093 | 4.364058  | -0.023228 |
| O | -2.118333 | 2.48077   | 0.625539  |
| O | -2.675791 | 4.834004  | -1.051906 |
| N | -5.115119 | 3.993785  | -1.828554 |
| C | -1.572281 | 4.584732  | 1.607539  |
| H | -1.021079 | 4.063439  | 2.396221  |
| H | -0.885017 | 4.831196  | 0.794013  |
| H | -1.972305 | 5.515742  | 2.021791  |
| H | -5.819465 | 4.682491  | -1.565438 |
| H | -5.595389 | 3.299388  | -2.398697 |
| H | -3.261845 | 4.845495  | -1.840047 |
| H | -4.593418 | 1.305153  | -1.324125 |
| H | -3.725705 | 1.249739  | 1.014472  |
| H | -5.31651  | 3.154445  | 0.143391  |
| H | -4.088182 | 5.203694  | 0.42976   |
| H | -3.395869 | 3.471357  | 1.918914  |
| H | -1.086302 | -3.737984 | -0.975941 |
| H | -1.633284 | 0.265304  | 1.727823  |
| H | -2.31264  | -2.012207 | 2.132794  |

**E= -1928.5474387 (Hartree)**

**A-C2**

|   | X        | Y        | Z        |
|---|----------|----------|----------|
| C | 0.24411  | 3.739985 | -0.03046 |
| C | -0.77348 | 2.743481 | -0.02584 |
| C | -2.15695 | 3.066517 | -0.04925 |
| C | -2.77118 | 0.704713 | 0.002143 |
| C | -3.1201  | 2.086227 | -0.03824 |

|   |          |          |          |
|---|----------|----------|----------|
| C | -3.76027 | -0.34329 | 0.035247 |
| C | 1.987792 | 2.03565  | -0.00608 |
| C | 1.573126 | 3.400362 | -0.0186  |
| C | 0.991663 | 1.02136  | -0.00344 |
| C | -0.39235 | 1.373385 | -0.00878 |
| C | -0.99166 | -1.02136 | -0.00344 |
| C | -1.39232 | 0.350143 | 0.00016  |
| C | -1.98779 | -2.03565 | -0.00609 |
| C | -3.35575 | -1.66561 | 0.024444 |
| C | 3.760267 | 0.343292 | 0.035245 |
| C | 3.355747 | 1.665607 | 0.024444 |
| C | 2.771183 | -0.70471 | 0.00214  |
| C | 1.39232  | -0.35014 | 0.000157 |
| C | 0.773479 | -2.74348 | -0.02585 |
| C | 0.392346 | -1.37339 | -0.00878 |
| C | -0.24411 | -3.73999 | -0.03047 |
| C | -1.57313 | -3.40036 | -0.01861 |
| C | 3.120096 | -2.08623 | -0.03824 |
| C | 2.156949 | -3.06652 | -0.04925 |
| H | -4.10709 | -2.45182 | 0.050902 |
| H | -2.45002 | 4.112707 | -0.08355 |
| H | -0.0515  | 4.786142 | -0.04318 |
| H | 2.335201 | 4.175841 | -0.01974 |
| H | 4.107085 | 2.451824 | 0.050899 |
| H | 4.164907 | -2.3762  | -0.08533 |
| H | 2.450014 | -4.11271 | -0.08355 |
| H | 0.0515   | -4.78614 | -0.04319 |
| H | -2.3352  | -4.17584 | -0.01974 |
| N | 5.118377 | 0.008091 | 0.011667 |
| H | 5.369218 | -0.79445 | 0.578641 |
| H | 5.728686 | 0.787721 | 0.232888 |
| H | -4.16491 | 2.376197 | -0.08533 |
| N | -5.11838 | -0.00808 | 0.011668 |
| H | -5.36922 | 0.794398 | 0.578738 |
| H | -5.72869 | -0.78773 | 0.232824 |

---

**E= -1032.6160455 (Hartree)**

A-C3

|   | X        | Y        | Z        |
|---|----------|----------|----------|
| C | -2.82989 | -4.91223 | -0.02734 |
| C | -2.82989 | -4.91223 | -0.02734 |
| C | -2.82989 | -4.91223 | -0.02734 |
| C | -2.82989 | -4.91223 | -0.02734 |
| C | -2.82989 | -4.91223 | -0.02734 |
| C | -2.82989 | -4.91223 | -0.02734 |
| C | -2.82989 | -4.91223 | -0.02734 |
| C | -2.82989 | -4.91223 | -0.02734 |
| C | -2.82989 | -4.91223 | -0.02734 |
| C | -2.82989 | -4.91223 | -0.02734 |
| C | -2.82989 | -4.91223 | -0.02734 |
| C | -2.82989 | -4.91223 | -0.02734 |
| C | -2.82989 | -4.91223 | -0.02734 |
| C | -2.82989 | -4.91223 | -0.02734 |
| C | -2.82989 | -4.91223 | -0.02734 |
| C | -2.82989 | -4.91223 | -0.02734 |
| C | -2.82989 | -4.91223 | -0.02734 |
| C | -2.82989 | -4.91223 | -0.02734 |
| C | -2.82989 | -4.91223 | -0.02734 |
| C | -2.82989 | -4.91223 | -0.02734 |
| C | -2.82989 | -4.91223 | -0.02734 |
| C | -2.82989 | -4.91223 | -0.02734 |
| C | -2.82989 | -4.91223 | -0.02734 |
| C | -2.82989 | -4.91223 | -0.02734 |
| C | -2.82989 | -4.91223 | -0.02734 |
| C | -2.82989 | -4.91223 | -0.02734 |
| C | -2.82989 | -4.91223 | -0.02734 |
| C | -2.82989 | -4.91223 | -0.02734 |
| C | -2.82989 | -4.91223 | -0.02734 |
| C | -2.82989 | -4.91223 | -0.02734 |
| C | -2.82989 | -4.91223 | -0.02734 |
| C | -2.82989 | -4.91223 | -0.02734 |
| C | -2.82989 | -4.91223 | -0.02734 |
| C | -2.82989 | -4.91223 | -0.02734 |
| C | -2.82989 | -4.91223 | -0.02734 |
| C | -2.82989 | -4.91223 | -0.02734 |
| C | -2.82989 | -4.91223 | -0.02734 |





**A-C4**

|   | X       | Y       | Z       |
|---|---------|---------|---------|
| C | 8.44215 | -1.9112 | -0.0308 |
| C | 8.66723 | -0.5589 | -0.0518 |
| C | 5.36621 | -5.8031 | 0.02918 |
| C | 5.59953 | -4.4048 | 0.02263 |
| C | 6.90212 | -3.851  | 0.01925 |
| C | 5.99569 | -1.5834 | -0.0005 |
| C | 7.12404 | -2.4756 | 0.00645 |
| C | 6.20622 | -0.1782 | -0.0095 |
| C | 7.53854 | 0.36927 | -0.0177 |
| C | 6.61225 | 2.64598 | 0.02185 |
| C | 7.70878 | 1.74793 | 0.01774 |
| C | 6.78728 | 4.051   | 0.03916 |
| C | 2.5726  | -8.2663 | 0.02195 |
| C | 3.83509 | -7.7609 | 0.02864 |
| C | 2.94594 | -5.4558 | 0.01898 |
| C | 4.08243 | -6.338  | 0.02624 |
| C | 3.15242 | -4.0502 | 0.01666 |
| C | 4.47193 | -3.5206 | 0.01561 |
| C | 3.55727 | -1.2292 | 0.00084 |
| C | 4.67902 | -2.1125 | 0.00939 |
| C | 3.76198 | 0.17353 | 0.00252 |
| C | 5.08952 | 0.70342 | -0.0045 |
| C | 4.16813 | 2.99421 | 0.00686 |
| C | 5.28498 | 2.11273 | 0.00665 |
| C | 4.36881 | 4.40043 | 0.01856 |
| C | 5.70733 | 4.92704 | 0.03443 |
| C | 4.80476 | 7.20259 | 0.03678 |
| C | 5.87307 | 6.36123 | 0.04359 |
| C | 0.11417 | -7.9052 | 0.00439 |
| C | 1.41247 | -7.4066 | 0.01362 |
| C | 0.50847 | -5.1075 | 0.00661 |
| C | 1.62657 | -5.9837 | 0.01386 |
| C | 0.71327 | -3.6943 | 0.00885 |
| C | 2.02951 | -3.1681 | 0.00714 |
| C | 1.11867 | -0.8805 | -0.0021 |
| C | 2.23445 | -1.7587 | 0.00838 |
| C | 1.32316 | 0.5285  | 0.00359 |

|   |         |         |         |
|---|---------|---------|---------|
| C | 2.64225 | 1.05516 | -0.0035 |
| C | 1.72886 | 3.34171 | -0.0019 |
| C | 2.84276 | 2.46491 | 0.00357 |
| C | 1.93218 | 4.75526 | 0.00479 |
| C | 3.25201 | 5.28006 | 0.01444 |
| C | 2.34456 | 7.55057 | 0.01498 |
| C | 3.44914 | 6.70535 | 0.02182 |
| C | -2.3446 | -7.5506 | -0.0152 |
| C | -1.0181 | -7.0529 | -0.0032 |
| C | -1.9322 | -4.7552 | -0.0054 |
| C | -0.8132 | -5.6342 | 0.00035 |
| C | -1.7289 | -3.3417 | 0.00106 |
| C | -0.4063 | -2.8142 | -0.0001 |
| C | -1.3232 | -0.5285 | -0.0046 |
| C | -0.2039 | -1.4089 | 0.00569 |
| C | -1.1187 | 0.88048 | 0.0011  |
| C | 0.20386 | 1.40894 | -0.0067 |
| C | -0.7133 | 3.69428 | -0.0097 |
| C | 0.40625 | 2.8142  | -0.0008 |
| C | -0.5085 | 5.10751 | -0.0072 |
| C | 0.81318 | 5.63425 | -0.0009 |
| C | -0.1142 | 7.90519 | -0.0046 |
| C | 1.01807 | 7.05291 | 0.00285 |
| C | -4.8048 | -7.2026 | -0.0366 |
| C | -3.4492 | -6.7053 | -0.022  |
| C | -4.3688 | -4.4004 | -0.0188 |
| C | -3.252  | -5.28   | -0.0149 |
| C | -4.1682 | -2.9942 | -0.0073 |
| C | -2.8428 | -2.4649 | -0.0043 |
| C | -3.762  | -0.1735 | -0.0031 |
| C | -2.6422 | -1.0552 | 0.00269 |
| C | -3.5573 | 1.22919 | -0.0014 |
| C | -2.2345 | 1.75867 | -0.0092 |
| C | -3.1524 | 4.05021 | -0.017  |
| C | -2.0295 | 3.16811 | -0.0078 |
| C | -2.9459 | 5.45579 | -0.0192 |
| C | -1.6265 | 5.98374 | -0.0142 |
| C | -2.5725 | 8.26627 | -0.0217 |
| C | -1.4124 | 7.40665 | -0.0137 |
| C | -5.8731 | -6.3612 | -0.0433 |
| C | -6.7873 | -4.0509 | -0.0388 |

|   |         |         |         |
|---|---------|---------|---------|
| C | -5.7074 | -4.927  | -0.0343 |
| C | -6.6122 | -2.646  | -0.0216 |
| C | -5.285  | -2.1127 | -0.0068 |
| C | -6.2063 | 0.17808 | 0.00974 |
| C | -5.0895 | -0.7034 | 0.00433 |
| C | -5.9957 | 1.58332 | 0.00083 |
| C | -4.679  | 2.1125  | -0.0095 |
| C | -5.5995 | 4.40479 | -0.0222 |
| C | -4.4719 | 3.5206  | -0.0157 |
| C | -5.3662 | 5.80322 | -0.0287 |
| C | -4.0824 | 6.33802 | -0.026  |
| C | -3.835  | 7.76095 | -0.0282 |
| C | -7.7087 | -1.7479 | -0.017  |
| C | -8.6672 | 0.55875 | 0.0534  |
| C | -7.5385 | -0.3693 | 0.01851 |
| C | -8.4422 | 1.91113 | 0.03235 |
| C | -7.1241 | 2.47552 | -0.0056 |
| C | -6.9022 | 3.85103 | -0.0184 |
| H | -6.8843 | -6.7594 | -0.055  |
| H | -7.7978 | -4.4523 | -0.0515 |
| H | -8.7055 | -2.1749 | -0.0617 |
| H | -9.2899 | 2.5922  | 0.06293 |
| H | -7.7553 | 4.52563 | -0.0201 |
| H | -6.2211 | 6.47558 | -0.033  |
| H | -4.6922 | 8.42941 | -0.0339 |
| H | 6.88426 | 6.7595  | 0.05564 |
| H | 7.79787 | 4.45239 | 0.05228 |
| H | 8.70562 | 2.17488 | 0.0629  |
| H | 9.28987 | -2.5923 | -0.0608 |
| H | 7.75522 | -4.5256 | 0.02144 |
| H | 6.2211  | -6.4755 | 0.03391 |
| H | 4.69229 | -8.4294 | 0.03464 |
| H | 2.41316 | -9.3415 | 0.02295 |
| H | -0.0419 | -8.9815 | 0.00339 |
| H | -2.499  | -8.6271 | -0.019  |
| H | -4.955  | -8.2791 | -0.0424 |
| H | -2.4131 | 9.34146 | -0.0225 |
| H | 0.04185 | 8.98146 | -0.0033 |
| H | 2.49894 | 8.62702 | 0.01898 |
| H | 4.95492 | 8.27912 | 0.04276 |
| N | -9.9588 | 0.0331  | 0.04293 |

|   |         |         |         |
|---|---------|---------|---------|
| N | 9.95894 | -0.0331 | -0.0404 |
| H | 10.6778 | -0.7199 | -0.2421 |
| H | 10.0916 | 0.78746 | -0.6213 |
| H | -10.091 | -0.7877 | 0.62366 |
| H | -10.678 | 0.71977 | 0.24515 |

**E= -3784.1293202 (Hartree)**

**O-C2**

|   | X         | Y         | Z         |
|---|-----------|-----------|-----------|
| C | 2.950697  | 1.612401  | 0.06115   |
| C | 1.627498  | 2.013795  | 0.083597  |
| C | 1.187127  | 3.349555  | -0.15926  |
| C | -1.169006 | 2.662037  | -0.093741 |
| C | -0.144361 | 3.665157  | -0.20798  |
| C | -2.558102 | 2.974772  | -0.210844 |
| C | 2.43989   | -0.809498 | 0.066932  |
| C | 3.354635  | 0.251041  | 0.022992  |
| C | 1.02985   | -0.489421 | 0.385672  |
| C | 0.59857   | 1.008725  | 0.389888  |
| C | -1.771852 | 0.281334  | 0.132631  |
| C | -0.816065 | 1.317393  | 0.126073  |
| C | -3.151361 | 0.620889  | -0.000036 |
| C | -3.515737 | 1.983321  | -0.138137 |
| C | 1.761411  | -3.154731 | -0.138463 |
| C | 2.740996  | -2.198704 | -0.108725 |
| C | 0.362453  | -2.833574 | -0.063961 |
| C | -0.019746 | -1.493192 | 0.133092  |
| C | -2.374652 | -2.128448 | 0.018287  |
| C | -1.381693 | -1.111194 | 0.134582  |
| C | -3.754866 | -1.740132 | -0.014841 |
| C | -4.124598 | -0.415653 | -0.025606 |
| C | -0.646705 | -3.825852 | -0.173744 |
| C | -1.977831 | -3.483517 | -0.110364 |
| H | -0.450797 | 4.690165  | -0.383616 |
| H | -4.568121 | 2.242027  | -0.228615 |
| H | 1.936818  | 4.121308  | -0.312212 |
| H | 3.724714  | 2.365999  | -0.05008  |

|   |           |           |           |
|---|-----------|-----------|-----------|
| H | 3.774984  | -2.515531 | -0.191581 |
| H | 2.040926  | -4.197853 | -0.256851 |
| H | -0.353691 | -4.863561 | -0.307239 |
| H | -2.743254 | -4.24723  | -0.189062 |
| H | -5.17637  | -0.148496 | -0.095619 |
| O | -2.866826 | 4.289266  | -0.392322 |
| O | -4.656794 | -2.759161 | -0.071987 |
| O | 5.658539  | 0.680902  | 0.488061  |
| O | 5.256087  | -0.842285 | -1.069981 |
| O | 0.835396  | 0.262904  | 1.598246  |
| C | 4.83393   | 0.054152  | -0.143061 |
| H | -3.830593 | 4.389169  | -0.465751 |
| H | -5.555475 | -2.393586 | -0.127915 |
| H | 4.506749  | -1.15934  | -1.604387 |

**E= -1336.0197749 (Hartree)**

**O-A-C2**

|   | X        | Y        | Z        |
|---|----------|----------|----------|
| C | 2.93995  | 1.630929 | 0.055025 |
| C | 1.611771 | 2.020063 | 0.064496 |
| C | 1.161527 | 3.34292  | -0.21379 |
| C | -1.201   | 2.652445 | -0.10466 |
| C | -0.17337 | 3.647113 | -0.26231 |
| C | -2.60113 | 2.969689 | -0.1897  |
| C | 2.4492   | -0.79318 | 0.068561 |
| C | 3.356065 | 0.274963 | 0.028921 |
| C | 1.036258 | -0.48511 | 0.381576 |
| C | 0.588337 | 1.014261 | 0.379063 |
| C | -1.7711  | 0.261777 | 0.129097 |
| C | -0.83047 | 1.310537 | 0.118105 |
| C | -3.15436 | 0.588894 | -0.00102 |
| C | -3.53417 | 1.945031 | -0.11553 |
| C | 1.792583 | -3.14407 | -0.13929 |
| C | 2.76343  | -2.1786  | -0.10692 |
| C | 0.390731 | -2.83538 | -0.06747 |
| C | -0.00369 | -1.49756 | 0.13013  |
| C | -2.35179 | -2.15398 | 0.014542 |

|   |          |          |          |
|---|----------|----------|----------|
| C | -1.36848 | -1.12661 | 0.130262 |
| C | -3.73569 | -1.77883 | -0.01678 |
| C | -4.11763 | -0.45849 | -0.02469 |
| C | -0.60937 | -3.8369  | -0.17875 |
| C | -1.94338 | -3.50523 | -0.11545 |
| H | -0.46158 | 4.666964 | -0.49464 |
| H | -4.59265 | 2.187082 | -0.17786 |
| H | 1.902754 | 4.114859 | -0.40207 |
| H | 3.706645 | 2.391624 | -0.05892 |
| H | 3.80022  | -2.48622 | -0.188   |
| H | 2.081129 | -4.1849  | -0.25759 |
| H | -0.30703 | -4.87193 | -0.31249 |
| H | -2.70256 | -4.27513 | -0.19463 |
| H | -5.17238 | -0.20109 | -0.09076 |
| O | -4.62829 | -2.8072  | -0.07403 |
| O | 5.651011 | 0.717694 | 0.520978 |
| O | 5.275873 | -0.7993  | -1.04938 |
| O | 0.832926 | 0.273426 | 1.587857 |
| C | 4.837285 | 0.088557 | -0.12288 |
| H | -5.52967 | -2.44868 | -0.1289  |
| H | 4.534194 | -1.12005 | -1.592   |
| N | -3.00517 | 4.285453 | -0.4063  |
| H | -3.9972  | 4.439099 | -0.26353 |
| H | -2.46693 | 4.993855 | 0.078736 |

**E= -1316.1565319 (Hartree)**

**DOX/A-C2**

|   | X        | Y        | Z        |
|---|----------|----------|----------|
| C | -6.55652 | -3.53434 | 1.002816 |
| C | -5.37252 | -2.74934 | 0.915096 |
| C | -4.15887 | -3.12733 | 1.548125 |
| C | -3.01417 | -1.15002 | 0.686595 |
| C | -3.0266  | -2.35781 | 1.442097 |
| C | -1.82852 | -0.33853 | 0.534365 |
| C | -7.79294 | -1.9125  | -0.32828 |
| C | -7.72233 | -3.13339 | 0.401923 |
| C | -6.62394 | -1.11095 | -0.4336  |

|   |          |          |          |
|---|----------|----------|----------|
| C | -5.40646 | -1.53027 | 0.183409 |
| C | -4.29232 | 0.500877 | -0.65376 |
| C | -4.22776 | -0.72642 | 0.071244 |
| C | -3.12287 | 1.304056 | -0.75471 |
| C | -1.92099 | 0.862137 | -0.15969 |
| C | -9.07227 | -0.27182 | -1.62116 |
| C | -8.99793 | -1.46114 | -0.9243  |
| C | -7.89507 | 0.541355 | -1.77397 |
| C | -6.68417 | 0.116913 | -1.15974 |
| C | -5.55043 | 2.145873 | -1.99343 |
| C | -5.50857 | 0.922318 | -1.26816 |
| C | -4.3661  | 2.933466 | -2.07823 |
| C | -3.20038 | 2.530882 | -1.48127 |
| C | -7.89627 | 1.753908 | -2.51894 |
| C | -6.76586 | 2.528301 | -2.61867 |
| H | -1.02764 | 1.471109 | -0.2672  |
| H | -4.13988 | -4.04174 | 2.137153 |
| H | -6.52271 | -4.46622 | 1.56301  |
| H | -8.61756 | -3.74605 | 0.481618 |
| H | -9.89304 | -2.07076 | -0.81131 |
| H | -8.79381 | 2.059303 | -3.04773 |
| H | -6.78813 | 3.449842 | -3.1961  |
| H | -4.40172 | 3.868118 | -2.63371 |
| H | -2.30565 | 3.144393 | -1.56051 |
| N | -10.2693 | 0.133307 | -2.23043 |
| H | -10.4541 | 1.1277   | -2.16515 |
| H | -11.0756 | -0.39247 | -1.91264 |
| H | -2.13841 | -2.67555 | 1.976934 |
| N | -0.60013 | -0.75195 | 1.014064 |
| H | -0.55146 | -1.55787 | 1.621311 |
| H | 0.061576 | -0.01671 | 1.249085 |
| C | 1.438095 | 6.987297 | 1.373381 |
| C | 2.332462 | 6.343974 | 0.523442 |
| C | 2.431497 | 4.949348 | 0.548201 |
| C | 1.612895 | 4.171813 | 1.397307 |
| C | 0.722581 | 4.840729 | 2.267309 |
| C | 0.651378 | 6.239392 | 2.247051 |
| H | 1.363375 | 8.07107  | 1.369097 |
| H | 2.970623 | 6.897503 | -0.15597 |
| H | -0.02401 | 6.723294 | 2.946367 |
| C | 3.683996 | 2.864051 | -0.17654 |



|   |          |          |          |
|---|----------|----------|----------|
| C | 4.732755 | 2.272944 | -0.90786 |
| C | 5.035762 | 0.899612 | -0.73709 |
| C | 4.309853 | 0.154734 | 0.184479 |
| C | 3.206302 | 0.722962 | 0.886276 |
| C | 2.885891 | 2.075497 | 0.701837 |
| C | 1.673609 | 2.680041 | 1.322424 |
| C | 3.438048 | 4.3022   | -0.32672 |
| C | 6.159102 | 0.318844 | -1.56385 |
| C | 6.16963  | -1.22167 | -1.596   |
| C | 5.982948 | -1.74703 | -0.15986 |
| C | 4.645744 | -1.29964 | 0.431083 |
| H | 7.124598 | 0.673503 | -1.18066 |
| H | 6.036194 | -2.84226 | -0.14191 |
| O | -0.00595 | 4.176087 | 3.211123 |
| O | 4.088962 | 4.991476 | -1.1372  |
| O | 0.726681 | 1.998274 | 1.705525 |
| O | 2.49868  | 0.003598 | 1.784201 |
| O | 5.489074 | 2.956788 | -1.7808  |
| H | 2.587198 | -0.96327 | 1.662852 |
| H | 5.141694 | 3.891381 | -1.77931 |
| C | -1.36637 | 3.876474 | 2.870568 |
| H | -1.8112  | 3.449924 | 3.771482 |
| H | -1.9104  | 4.788772 | 2.592163 |
| H | -1.40973 | 3.145337 | 2.059313 |
| O | 8.568697 | -1.34104 | -1.59429 |
| C | 7.526954 | -1.70447 | -2.11771 |
| C | 7.572324 | -2.66596 | -3.29184 |
| H | 6.953781 | -3.54373 | -3.05    |
| H | 7.076583 | -2.18288 | -4.14904 |
| O | 8.890646 | -3.03578 | -3.59048 |
| H | 9.450238 | -2.52237 | -2.97588 |
| O | 5.17498  | -1.73899 | -2.47454 |
| H | 4.346773 | -1.84287 | -1.9741  |
| O | 3.5436   | -2.06023 | -0.16566 |
| C | 3.153167 | -3.22321 | 0.511581 |
| C | 2.007105 | -3.86167 | -0.25731 |
| C | 1.437324 | -5.05253 | 0.526401 |
| H | 1.233292 | -3.09762 | -0.39104 |
| C | 2.248903 | -3.89143 | 2.641151 |
| C | 1.078683 | -4.62211 | 1.971406 |
| O | 2.722242 | -2.81769 | 1.806204 |

|   |          |          |          |
|---|----------|----------|----------|
| O | -0.06427 | -3.7909  | 1.942482 |
| N | 0.19435  | -5.50809 | -0.10904 |
| C | 1.904433 | -3.2906  | 3.994913 |
| H | 2.775731 | -2.7788  | 4.414152 |
| H | 1.084757 | -2.57506 | 3.897075 |
| H | 1.595761 | -4.07915 | 4.688977 |
| H | -0.03007 | -6.46243 | 0.166497 |
| H | 0.268563 | -5.49565 | -1.12367 |
| H | -0.58362 | -4.12364 | 1.17728  |
| H | 2.35862  | -4.18096 | -1.24595 |
| H | 4.003448 | -3.91933 | 0.632975 |
| H | 2.205528 | -5.84264 | 0.585048 |
| H | 0.87655  | -5.52967 | 2.569377 |
| H | 3.070421 | -4.61929 | 2.754138 |
| H | 6.079462 | 0.694918 | -2.58874 |
| H | 4.642674 | -1.49708 | 1.507905 |
| H | 6.802962 | -1.37074 | 0.4612   |

**E= -2961.1726742 (Hartree)**

**DOX/A-C3**

|   | X       | Y       | Z       |
|---|---------|---------|---------|
| C | 5.9099  | -5.2974 | -1.6852 |
| C | 4.56454 | -4.9751 | -1.4741 |
| C | 3.51175 | -5.9445 | -1.6154 |
| C | 1.82302 | -4.2734 | -1.0454 |
| C | 2.20632 | -5.6099 | -1.4128 |
| C | 0.48718 | -3.9074 | -0.8462 |
| C | 9.2849  | -3.7199 | -1.6478 |
| C | 8.30802 | -4.6648 | -1.7646 |
| C | 6.59583 | -2.9984 | -1.191  |
| C | 6.9279  | -4.3422 | -1.5533 |
| C | 5.23413 | -2.6543 | -0.9622 |
| C | 4.21555 | -3.636  | -1.1069 |
| C | 2.50215 | -1.9585 | -0.5208 |
| C | 2.84944 | -3.2875 | -0.8881 |
| C | 1.13942 | -1.6084 | -0.309  |
| C | 0.12363 | -2.6004 | -0.4894 |

|   |         |         |         |
|---|---------|---------|---------|
| C | -1.5773 | -0.9288 | 0.02265 |
| C | -1.2441 | -2.2059 | -0.3237 |
| C | 9.99612 | -1.3596 | -1.2103 |
| C | 8.98665 | -2.3562 | -1.3069 |
| C | 7.2702  | -0.6825 | -0.6915 |
| C | 7.62168 | -2.0101 | -1.0574 |
| C | 5.90427 | -0.3382 | -0.4534 |
| C | 4.88518 | -1.3172 | -0.5972 |
| C | 3.17651 | 0.35574 | -0.0056 |
| C | 3.52592 | -0.9728 | -0.3684 |
| C | 1.80949 | 0.70403 | 0.21794 |
| C | 0.78787 | -0.2728 | 0.06522 |
| C | -0.9365 | 1.40508 | 0.64221 |
| C | -0.5823 | 0.07766 | 0.2598  |
| C | 10.6513 | 0.97922 | -0.6039 |
| C | 9.65919 | -0.043  | -0.7936 |
| C | 7.94102 | 1.62789 | -0.1628 |
| C | 8.29173 | 0.29497 | -0.5461 |
| C | 6.57994 | 1.97337 | 0.06732 |
| C | 5.55568 | 0.98864 | -0.0861 |
| C | 3.84781 | 2.66769 | 0.51655 |
| C | 4.19625 | 1.33308 | 0.14342 |
| C | 2.48535 | 3.01209 | 0.74281 |
| C | 1.45525 | 2.03124 | 0.5825  |
| C | -0.1992 | 3.72407 | 1.24077 |
| C | 0.08623 | 2.38213 | 0.81415 |
| C | 10.3183 | 2.24719 | -0.2273 |
| C | 8.5935  | 3.92691 | 0.37385 |
| C | 8.95438 | 2.62547 | -0.0022 |
| C | 7.25968 | 4.28644 | 0.59935 |
| C | 6.23359 | 3.30007 | 0.44423 |
| C | 4.52153 | 4.98116 | 1.05559 |
| C | 4.86814 | 3.64648 | 0.67148 |
| C | 3.17743 | 5.30004 | 1.28008 |
| C | 2.15779 | 4.34877 | 1.13512 |
| C | 0.78234 | 4.66059 | 1.38655 |
| C | 6.8789  | 5.61825 | 0.98451 |
| C | 5.57476 | 5.94896 | 1.20203 |
| H | -1.2187 | 4.01397 | 1.4664  |
| H | -2.6237 | -0.6604 | 0.0997  |
| H | -2.0223 | -2.9445 | -0.4979 |

|   |         |         |         |
|---|---------|---------|---------|
| H | -0.2924 | -4.6546 | -0.977  |
| H | 1.42425 | -6.3561 | -1.528  |
| H | 3.7814  | -6.9604 | -1.8928 |
| H | 6.17429 | -6.3156 | -1.9616 |
| H | 8.56859 | -5.689  | -2.0183 |
| H | 10.3148 | -4.0292 | -1.7926 |
| H | 11.7027 | 0.74366 | -0.7318 |
| H | 11.0942 | 2.99495 | -0.086  |
| H | 9.37226 | 4.67671 | 0.49345 |
| H | 7.66126 | 6.36399 | 1.10055 |
| H | 5.30658 | 6.9613  | 1.49365 |
| H | 2.91548 | 6.31267 | 1.57857 |
| H | 0.53053 | 5.6662  | 1.71365 |
| N | -2.275  | 1.72041 | 0.78893 |
| H | -2.5349 | 2.68799 | 0.94072 |
| H | -2.8645 | 1.06196 | 1.29262 |
| N | 11.3232 | -1.6884 | -1.4667 |
| H | 11.9122 | -0.9169 | -1.7518 |
| H | 11.4613 | -2.4721 | -2.0913 |
| C | -3.6942 | -5.0469 | 4.90746 |
| C | -4.3512 | -5.0635 | 3.68014 |
| C | -4.5376 | -3.8714 | 2.9736  |
| C | -4.038  | -2.6442 | 3.46633 |
| C | -3.3841 | -2.644  | 4.71801 |
| C | -3.226  | -3.8415 | 5.4261  |
| H | -3.5583 | -5.967  | 5.46752 |
| H | -4.7382 | -5.9855 | 3.26208 |
| H | -2.74   | -3.8036 | 6.39637 |
| C | -5.6822 | -2.6557 | 1.0667  |
| C | -6.542  | -2.685  | -0.047  |
| C | -7.0036 | -1.4774 | -0.6287 |
| C | -6.6235 | -0.2639 | -0.0683 |
| C | -5.7007 | -0.2169 | 1.0198  |
| C | -5.2197 | -1.4094 | 1.58162 |
| C | -4.1796 | -1.4046 | 2.64464 |
| C | -5.2928 | -3.9176 | 1.70006 |
| C | -7.9123 | -1.5784 | -1.8321 |
| C | -8.0511 | -0.2552 | -2.6063 |
| C | -8.3232 | 0.87783 | -1.5992 |
| C | -7.1575 | 1.0402  | -0.6242 |
| H | -8.908  | -1.9159 | -1.5179 |

|   |         |         |         |
|---|---------|---------|---------|
| H | -8.4886 | 1.82916 | -2.1162 |
| O | -2.9719 | -1.483  | 5.31611 |
| O | -5.6307 | -5.0193 | 1.21732 |
| O | -3.4251 | -0.4467 | 2.81685 |
| O | -5.3184 | 0.95308 | 1.57197 |
| O | -6.9721 | -3.8324 | -0.6012 |
| H | -5.5179 | 1.74209 | 1.01948 |
| H | -6.5557 | -4.5681 | -0.0716 |
| C | -1.5759 | -1.1802 | 5.17304 |
| H | -1.4026 | -0.274  | 5.75639 |
| H | -0.9558 | -1.9934 | 5.56893 |
| H | -1.3319 | -0.9966 | 4.12303 |
| O | -10.34  | -0.724  | -3.1939 |
| C | -9.2391 | -0.3463 | -3.5678 |
| C | -9.0455 | 0.06702 | -5.0155 |
| H | -8.6401 | 1.08885 | -5.0412 |
| H | -8.2705 | -0.5788 | -5.455  |
| O | -10.257 | -0.0219 | -5.7275 |
| H | -10.905 | -0.3736 | -5.085  |
| O | -6.8829 | 0.00132 | -3.3841 |
| H | -6.3362 | 0.65663 | -2.9127 |
| O | -6.0254 | 1.68238 | -1.294  |
| C | -5.9433 | 3.07968 | -1.1473 |
| C | -4.7444 | 3.57795 | -1.9372 |
| C | -4.4779 | 5.06192 | -1.6411 |
| H | -3.8771 | 2.97927 | -1.6385 |
| C | -5.6093 | 4.70666 | 0.60704 |
| C | -4.402  | 5.30917 | -0.1145 |
| O | -5.7611 | 3.31703 | 0.24737 |
| O | -3.191  | 4.75244 | 0.38639 |
| N | -3.1726 | 5.44444 | -2.2021 |
| C | -5.5265 | 4.77472 | 2.12366 |
| H | -6.423  | 4.33558 | 2.57148 |
| H | -4.6469 | 4.23634 | 2.48661 |
| H | -5.4537 | 5.81834 | 2.44582 |
| H | -3.1187 | 6.45746 | -2.3027 |
| H | -3.0578 | 5.05668 | -3.137  |
| H | -2.5683 | 4.87058 | -0.3676 |
| H | -4.919  | 3.42666 | -3.0082 |
| H | -6.8795 | 3.56723 | -1.4635 |
| H | -5.3081 | 5.66265 | -2.0431 |

|   |         |         |         |
|---|---------|---------|---------|
| H | -4.4179 | 6.39641 | 0.06825 |
| H | -6.5037 | 5.24558 | 0.25962 |
| H | -7.5258 | -2.3466 | -2.5096 |
| H | -7.4758 | 1.68494 | 0.20042 |
| H | -9.2364 | 0.64521 | -1.0419 |

**E= -4108.2233589 (Hartree)**

**DOX/A-C4**

|   | X       | Y       | Z       |
|---|---------|---------|---------|
| C | 11.7649 | -3.6291 | -0.7735 |
| C | 12.2787 | -2.361  | -0.7584 |
| C | 7.91204 | -6.752  | -0.6511 |
| C | 8.44917 | -5.4417 | -0.6196 |
| C | 9.83956 | -5.186  | -0.6882 |
| C | 9.45892 | -2.7783 | -0.5621 |
| C | 10.3589 | -3.8951 | -0.6643 |
| C | 9.97424 | -1.4547 | -0.532  |
| C | 11.3913 | -1.2125 | -0.6073 |
| C | 10.9989 | 1.20591 | -0.4172 |
| C | 11.8658 | 0.09069 | -0.5285 |
| C | 11.4798 | 2.53578 | -0.3557 |
| C | 4.64721 | -8.5392 | -0.5705 |
| C | 5.98806 | -8.3236 | -0.6267 |
| C | 5.63324 | -5.8845 | -0.4893 |
| C | 6.54425 | -6.9924 | -0.5905 |
| C | 6.14555 | -4.5604 | -0.451  |
| C | 7.5474  | -4.3331 | -0.5186 |
| C | 7.16409 | -1.8998 | -0.3852 |
| C | 8.0606  | -3.0062 | -0.4849 |
| C | 7.67416 | -0.5781 | -0.343  |
| C | 9.08322 | -0.352  | -0.4182 |
| C | 8.69548 | 2.08144 | -0.2569 |
| C | 9.58716 | 0.9779  | -0.3664 |
| C | 9.20268 | 3.40703 | -0.2034 |
| C | 10.623  | 3.62593 | -0.2553 |
| C | 10.2478 | 6.039   | -0.1038 |
| C | 11.1017 | 4.98604 | -0.2009 |

|   |         |         |         |
|---|---------|---------|---------|
| C | 2.3334  | -7.6485 | -0.4135 |
| C | 3.70779 | -7.4484 | -0.4696 |
| C | 3.33735 | -5.0113 | -0.3282 |
| C | 4.23183 | -6.1096 | -0.4282 |
| C | 3.85036 | -3.6795 | -0.284  |
| C | 5.24789 | -3.4547 | -0.3526 |
| C | 4.86806 | -1.0265 | -0.2125 |
| C | 5.75989 | -2.1266 | -0.3099 |
| C | 5.37953 | 0.30123 | -0.1644 |
| C | 6.77958 | 0.52614 | -0.2403 |
| C | 6.39767 | 2.95368 | -0.0873 |
| C | 7.28775 | 1.85547 | -0.1917 |
| C | 6.90931 | 4.28594 | -0.0383 |
| C | 8.31042 | 4.50798 | -0.0979 |
| C | 7.92965 | 6.91655 | 0.05437 |
| C | 8.81815 | 5.85254 | -0.0476 |
| C | 0.01707 | -6.7637 | -0.2587 |
| C | 1.41915 | -6.5714 | -0.3139 |
| C | 1.03879 | -4.1335 | -0.1659 |
| C | 1.9337  | -5.2346 | -0.2681 |
| C | 1.55106 | -2.8015 | -0.1162 |
| C | 2.95529 | -2.5767 | -0.1848 |
| C | 2.56972 | -0.1491 | -0.0362 |
| C | 3.4643  | -1.2523 | -0.1361 |
| C | 3.08118 | 1.17839 | 0.01386 |
| C | 4.48476 | 1.40431 | -0.0646 |
| C | 4.09858 | 3.83134 | 0.08821 |
| C | 4.99361 | 2.72876 | -0.0157 |
| C | 4.6113  | 5.16311 | 0.1338  |
| C | 6.01438 | 5.38688 | 0.0681  |
| C | 5.61447 | 7.80047 | 0.22094 |
| C | 6.52824 | 6.72384 | 0.1143  |
| C | -2.3021 | -5.8848 | -0.1047 |
| C | -0.8717 | -5.6993 | -0.1603 |
| C | -1.2547 | -3.2539 | -0.0053 |
| C | -0.3627 | -4.355  | -0.1096 |
| C | -0.7464 | -1.9288 | 0.05187 |
| C | 0.66135 | -1.7032 | -0.0118 |
| C | 0.27548 | 0.7299  | 0.14983 |
| C | 1.16978 | -0.374  | 0.04033 |
| C | 0.78548 | 2.05124 | 0.1975  |

|   |         |         |         |
|---|---------|---------|---------|
| C | 2.18939 | 2.27819 | 0.11695 |
| C | 1.80358 | 4.71127 | 0.27094 |
| C | 2.7014  | 3.60621 | 0.16249 |
| C | 2.3163  | 6.03515 | 0.31192 |
| C | 3.71689 | 6.26084 | 0.24223 |
| C | 3.30157 | 8.68985 | 0.39637 |
| C | 4.24072 | 7.59982 | 0.28485 |
| C | -3.1568 | -4.832  | -0.009  |
| C | -3.5302 | -2.3807 | 0.14332 |
| C | -2.6754 | -3.4723 | 0.04381 |
| C | -3.0483 | -1.0515 | 0.21533 |
| C | -1.6369 | -0.8253 | 0.16664 |
| C | -2.0239 | 1.60498 | 0.3592  |
| C | -1.133  | 0.50368 | 0.22915 |
| C | -1.5086 | 2.92812 | 0.39623 |
| C | -0.1111 | 3.15672 | 0.3093  |
| C | -0.5002 | 5.58983 | 0.46535 |
| C | 0.40271 | 4.48317 | 0.34789 |
| C | 0.03815 | 6.90042 | 0.49872 |
| C | 1.40518 | 7.14188 | 0.42604 |
| C | 1.96136 | 8.47314 | 0.4629  |
| C | -3.9147 | 0.06211 | 0.34231 |
| C | -4.3362 | 2.505   | 0.62119 |
| C | -3.44   | 1.3628  | 0.44406 |
| C | -3.8148 | 3.77578 | 0.64331 |
| C | -2.412  | 4.04168 | 0.51818 |
| C | -1.8891 | 5.33313 | 0.54725 |
| H | -4.2307 | -4.9989 | 0.03531 |
| H | -4.6045 | -2.5484 | 0.17187 |
| H | -4.9831 | -0.1193 | 0.35049 |
| H | -4.4819 | 4.61866 | 0.80921 |
| H | -2.5692 | 6.17705 | 0.64455 |
| H | -0.6449 | 7.74289 | 0.58837 |
| H | 1.27489 | 9.31233 | 0.54837 |
| H | 12.1756 | 5.15268 | -0.2398 |
| H | 12.5541 | 2.70566 | -0.3913 |
| H | 12.9349 | 0.28131 | -0.5192 |
| H | 12.4372 | -4.4769 | -0.8925 |
| H | 10.5209 | -6.0305 | -0.7683 |
| H | 8.59587 | -7.5949 | -0.7284 |
| H | 6.67478 | -9.1634 | -0.7028 |



|   |         |         |         |
|---|---------|---------|---------|
| H | 4.2537  | -9.5525 | -0.6006 |
| H | 1.94291 | -8.6635 | -0.4465 |
| H | -0.3723 | -7.779  | -0.2951 |
| H | -2.6879 | -6.9007 | -0.1415 |
| H | 3.69483 | 9.70317 | 0.42735 |
| H | 6.00503 | 8.81539 | 0.2545  |
| H | 8.31907 | 7.93181 | 0.09072 |
| H | 10.6333 | 7.05497 | -0.0652 |
| N | -5.7019 | 2.26697 | 0.70572 |
| N | 13.6562 | -2.1249 | -0.831  |
| H | 14.1912 | -2.9457 | -1.0913 |
| H | 13.9147 | -1.3368 | -1.4141 |
| H | -5.9912 | 1.49865 | 1.30876 |
| H | -6.2586 | 3.10316 | 0.85962 |
| C | -5.4613 | -4.763  | 4.66296 |
| C | -6.1168 | -4.8857 | 3.44155 |
| C | -6.5786 | -3.7411 | 2.7843  |
| C | -6.3603 | -2.4514 | 3.31947 |
| C | -5.6969 | -2.3442 | 4.56184 |
| C | -5.2654 | -3.5018 | 5.22158 |
| H | -5.1116 | -5.6481 | 5.18658 |
| H | -6.2923 | -5.8534 | 2.98557 |
| H | -4.7847 | -3.3856 | 6.18831 |
| C | -8.0036 | -2.7508 | 0.93432 |
| C | -8.8498 | -2.9382 | -0.1765 |
| C | -9.5764 | -1.8457 | -0.7125 |
| C | -9.4606 | -0.5971 | -0.1135 |
| C | -8.5618 | -0.3784 | 0.97167 |
| C | -7.8267 | -1.4517 | 1.49303 |
| C | -6.7895 | -1.2479 | 2.54453 |
| C | -7.3197 | -3.9124 | 1.51226 |
| C | -10.464 | -2.1074 | -1.9073 |
| C | -10.909 | -0.8282 | -2.6432 |
| C | -11.374 | 0.20839 | -1.6022 |
| C | -10.247 | 0.5832  | -0.6406 |
| H | -11.356 | -2.6635 | -1.5893 |
| H | -11.738 | 1.1144  | -2.1016 |
| O | -5.5414 | -1.1471 | 5.19952 |
| O | -7.3883 | -5.0389 | 0.97884 |
| O | -6.2567 | -0.157  | 2.73051 |
| O | -8.4563 | 0.83049 | 1.56331 |

|   |         |         |         |
|---|---------|---------|---------|
| O | -9.0181 | -4.1297 | -0.7709 |
| H | -8.7306 | 1.57053 | 0.98421 |
| H | -8.432  | -4.7718 | -0.2836 |
| C | -4.2793 | -0.4943 | 5.00496 |
| H | -4.3093 | 0.40231 | 5.62682 |
| H | -3.452  | -1.1383 | 5.33073 |
| H | -4.1503 | -0.2118 | 3.95712 |
| O | -13.098 | -1.6971 | -3.1152 |
| C | -12.093 | -1.1609 | -3.5572 |
| C | -12.022 | -0.7987 | -5.0298 |
| H | -11.799 | 0.27573 | -5.1162 |
| H | -11.153 | -1.3162 | -5.4671 |
| O | -13.213 | -1.1286 | -5.6891 |
| H | -13.772 | -1.5634 | -5.0156 |
| O | -9.8747 | -0.3085 | -3.4725 |
| H | -9.3138 | 0.27553 | -2.9327 |
| O | -9.2608 | 1.43002 | -1.3173 |
| C | -9.437  | 2.81403 | -1.2016 |
| C | -8.3416 | 3.4997  | -2.004  |
| C | -8.3714 | 5.01723 | -1.7722 |
| H | -7.3843 | 3.08594 | -1.6685 |
| C | -9.4353 | 4.53213 | 0.4874  |
| C | -8.3601 | 5.33408 | -0.255  |
| O | -9.3172 | 3.12941 | 0.1826  |
| O | -7.081  | 5.04696 | 0.27721 |
| N | -7.1638 | 5.62494 | -2.3475 |
| C | -9.3741 | 4.67385 | 2.0003  |
| H | -10.158 | 4.0719  | 2.46873 |
| H | -8.402  | 4.34683 | 2.37697 |
| H | -9.5213 | 5.72073 | 2.28529 |
| H | -7.2998 | 6.62021 | -2.5154 |
| H | -6.9225 | 5.19879 | -3.2395 |
| H | -6.4689 | 5.23495 | -0.4687 |
| H | -8.4673 | 3.26934 | -3.069  |
| H | -10.446 | 3.11816 | -1.5373 |
| H | -9.303  | 5.42554 | -2.1997 |
| H | -8.5978 | 6.40464 | -0.1175 |
| H | -10.417 | 4.87742 | 0.11992 |
| H | -9.9343 | -2.7555 | -2.6124 |
| H | -10.66  | 1.15254 | 0.1985  |
| H | -12.213 | -0.2128 | -1.0372 |

---

E= -5712.6885594 (Hartree)

**DOX/O-C2**

|   | X       | Y       | Z       |
|---|---------|---------|---------|
| C | 1.91789 | -2.6415 | 0.29645 |
| C | 3.21102 | -2.6797 | -0.203  |
| C | 3.62891 | -3.5046 | -1.29   |
| C | 5.85875 | -2.4836 | -1.308  |
| C | 4.90009 | -3.4388 | -1.7947 |
| C | 7.1655  | -2.3614 | -1.8672 |
| C | 2.27935 | -0.5807 | 1.61038 |
| C | 1.45575 | -1.6162 | 1.15714 |
| C | 3.73281 | -0.7124 | 1.4081  |
| C | 4.23236 | -1.8338 | 0.42602 |
| C | 6.37968 | -0.5892 | 0.18744 |
| C | 5.51943 | -1.6204 | -0.2496 |
| C | 7.67624 | -0.4867 | -0.3962 |
| C | 8.05154 | -1.4123 | -1.4021 |
| C | 2.70384 | 1.59076 | 2.65362 |
| C | 1.83724 | 0.5922  | 2.29927 |
| C | 4.09425 | 1.57348 | 2.2845  |
| C | 4.60249 | 0.45997 | 1.58844 |
| C | 6.78661 | 1.5352  | 1.41536 |
| C | 5.92971 | 0.44093 | 1.09771 |
| C | 8.11795 | 1.53562 | 0.88937 |
| C | 8.54219 | 0.56394 | 0.01513 |
| C | 4.97385 | 2.64589 | 2.58851 |
| C | 6.28977 | 2.61386 | 2.19006 |
| H | 5.19637 | -4.0855 | -2.6129 |
| H | 9.04532 | -1.3393 | -1.8416 |
| H | 2.90737 | -4.1965 | -1.7173 |
| H | 1.18737 | -3.3562 | -0.0741 |
| H | 0.78548 | 0.68634 | 2.54788 |
| H | 2.33049 | 2.4569  | 3.19388 |
| H | 4.59269 | 3.49628 | 3.14823 |
| H | 6.95921 | 3.43126 | 2.43338 |
| H | 9.54477 | 0.61514 | -0.4072 |
| O | 7.47797 | -3.2327 | -2.8727 |

|   |         |         |         |
|---|---------|---------|---------|
| O | 8.91281 | 2.57765 | 1.27665 |
| O | -0.4643 | -2.6128 | 2.15692 |
| O | -0.7893 | -0.6568 | 1.15977 |
| O | 4.31344 | -1.9437 | 1.85175 |
| C | -0.0034 | -1.6772 | 1.53318 |
| H | 8.38405 | -3.0567 | -3.1705 |
| H | 9.77778 | 2.48805 | 0.84711 |
| H | -0.3709 | -0.0619 | 0.4855  |
| C | 0.76311 | 6.22286 | -1.5169 |
| C | -0.505  | 6.03016 | -0.9753 |
| C | -0.9968 | 4.73258 | -0.8077 |
| C | -0.2097 | 3.60774 | -1.141  |
| C | 1.0637  | 3.81856 | -1.7109 |
| C | 1.53283 | 5.12487 | -1.8968 |
| H | 1.14612 | 7.22884 | -1.6635 |
| H | -1.1352 | 6.86508 | -0.6903 |
| H | 2.5043  | 5.25771 | -2.3636 |
| C | -2.9758 | 3.2202  | -0.3495 |
| C | -4.3427 | 3.06627 | -0.053  |
| C | -4.966  | 1.79932 | -0.1926 |
| C | -4.2218 | 0.72467 | -0.6626 |
| C | -2.8215 | 0.84877 | -0.9052 |
| C | -2.195  | 2.08799 | -0.7243 |
| C | -0.7225 | 2.24372 | -0.8226 |
| C | -2.3793 | 4.55731 | -0.2975 |
| C | -6.4325 | 1.69465 | 0.15539 |
| C | -6.93   | 0.24386 | 0.30865 |
| C | -6.4012 | -0.5877 | -0.8766 |
| C | -4.8726 | -0.6209 | -0.8965 |
| H | -7.0333 | 2.19892 | -0.6124 |
| H | -6.7819 | -1.6148 | -0.8252 |
| O | 1.80741 | 2.77893 | -2.1883 |
| O | -3.0262 | 5.54675 | 0.09987 |
| O | 0.06421 | 1.32466 | -0.5798 |
| O | -2.0928 | -0.1738 | -1.3948 |
| O | -5.1167 | 4.08353 | 0.35616 |
| H | -2.4502 | -1.0578 | -1.1634 |
| H | -4.5277 | 4.88621 | 0.39464 |
| C | 2.89261 | 2.34658 | -1.357  |
| H | 3.4075  | 1.56582 | -1.9195 |
| H | 3.58917 | 3.17072 | -1.155  |

|   |         |         |         |
|---|---------|---------|---------|
| H | 2.51244 | 1.93768 | -0.4181 |
| O | -9.0728 | 0.753   | -0.6534 |
| C | -8.4615 | 0.22831 | 0.26456 |
| C | -9.2282 | -0.4742 | 1.37109 |
| H | -8.8611 | -1.509  | 1.45056 |
| H | -8.9656 | 0.00608 | 2.32711 |
| O | -10.608 | -0.4378 | 1.12932 |
| H | -10.714 | 0.08601 | 0.31138 |
| O | -6.5404 | -0.3172 | 1.55757 |
| H | -5.671  | -0.7424 | 1.44792 |
| O | -4.3694 | -1.4917 | 0.16403 |
| C | -4.1239 | -2.8253 | -0.2    |
| C | -3.6347 | -3.5812 | 1.0246  |
| C | -3.1827 | -4.9962 | 0.63172 |
| H | -2.7956 | -3.0298 | 1.46242 |
| C | -2.7267 | -4.0903 | -1.6952 |
| C | -2.1758 | -4.9443 | -0.5449 |
| O | -3.125  | -2.7917 | -1.2125 |
| O | -0.94   | -4.4219 | -0.1169 |
| N | -2.4992 | -5.6205 | 1.76804 |
| C | -1.7303 | -3.8615 | -2.8203 |
| H | -2.1776 | -3.246  | -3.6067 |
| H | -0.8399 | -3.3585 | -2.436  |
| H | -1.4291 | -4.82   | -3.2561 |
| H | -2.4794 | -6.6339 | 1.67364 |
| H | -2.962  | -5.4017 | 2.64676 |
| H | -0.8956 | -4.5838 | 0.8491  |
| H | -4.4421 | -3.6324 | 1.76613 |
| H | -5.0317 | -3.2885 | -0.6303 |
| H | -4.0644 | -5.5677 | 0.28923 |
| H | -2.0477 | -5.972  | -0.9356 |
| H | -3.6264 | -4.595  | -2.0876 |
| H | -6.6168 | 2.23263 | 1.09093 |
| H | -4.5294 | -1.0247 | -1.8543 |
| H | -6.7728 | -0.1472 | -1.8082 |

---

**E= -3264.5809872 (Hartree)**

**DOX/O-A-C2**

|   | X       | Y       | Z       |
|---|---------|---------|---------|
| C | -3.6138 | 0.69919 | -1.4039 |
| C | -2.2782 | 0.75373 | -1.7657 |
| C | -1.6441 | -0.177  | -2.6379 |
| C | 0.46558 | 1.09694 | -2.6013 |
| C | -0.3323 | -0.0292 | -3.006  |
| C | 1.83549 | 1.26013 | -3.0096 |
| C | -3.6645 | 2.9833  | -0.4546 |
| C | -4.2977 | 1.77919 | -0.789  |
| C | -2.1879 | 3.02054 | -0.5157 |
| C | -1.4473 | 1.83238 | -1.2148 |
| C | 0.5527  | 3.29193 | -1.4735 |
| C | -0.1137 | 2.08984 | -1.7844 |
| C | 1.89412 | 3.46272 | -1.9323 |
| C | 2.51362 | 2.4189  | -2.6553 |
| C | -3.6076 | 5.33306 | 0.22842 |
| C | -4.3064 | 4.17724 | 0.00191 |
| C | -2.2004 | 5.45172 | -0.0371 |
| C | -1.4899 | 4.31661 | -0.4733 |
| C | 0.55353 | 5.63963 | -0.6517 |
| C | -0.1237 | 4.39691 | -0.8309 |
| C | 1.93053 | 5.73182 | -1.0405 |
| C | 2.57154 | 4.68447 | -1.6578 |
| C | -1.5011 | 6.67513 | 0.13195 |
| C | -0.1556 | 6.75774 | -0.1448 |
| H | 0.0976  | -0.761  | -3.6819 |
| H | 3.54848 | 2.54218 | -2.966  |
| H | -2.2179 | -1.0219 | -3.006  |
| H | -4.2019 | -0.1621 | -1.7073 |
| H | -5.3733 | 4.16983 | 0.19763 |
| H | -4.1356 | 6.21107 | 0.5898  |
| H | -2.0423 | 7.54816 | 0.48596 |
| H | 0.37381 | 7.69383 | -0.007  |
| H | 3.60482 | 4.79638 | -1.979  |
| O | 2.53828 | 6.92613 | -0.7902 |
| O | -6.2276 | 0.56161 | -0.07   |
| O | -6.618  | 2.50355 | -1.0526 |
| O | -1.5236 | 1.97284 | 0.21549 |

|   |         |         |         |
|---|---------|---------|---------|
| C | -5.767  | 1.55858 | -0.5942 |
| H | 3.45296 | 6.89747 | -1.1165 |
| H | -6.1357 | 3.17719 | -1.5645 |
| N | 2.44975 | 0.29175 | -3.7996 |
| H | 3.45846 | 0.38317 | -3.8492 |
| H | 2.19934 | -0.6704 | -3.5991 |
| C | 7.66546 | 0.01826 | 0.48973 |
| C | 6.74223 | -0.5037 | -0.4114 |
| C | 5.44079 | -0.7926 | 0.01338 |
| C | 5.02626 | -0.5352 | 1.33962 |
| C | 5.98264 | -0.0238 | 2.24487 |
| C | 7.28748 | 0.24328 | 1.81199 |
| H | 8.68028 | 0.23499 | 0.17059 |
| H | 7.0142  | -0.7083 | -1.4403 |
| H | 8.00127 | 0.61728 | 2.53965 |
| C | 3.21687 | -1.9088 | -0.476  |
| C | 2.40872 | -2.652  | -1.3567 |
| C | 1.19373 | -3.2247 | -0.9118 |
| C | 0.79109 | -3.0117 | 0.4004  |
| C | 1.55097 | -2.184  | 1.282   |
| C | 2.78294 | -1.6564 | 0.85929 |
| C | 3.60311 | -0.7774 | 1.74252 |
| C | 4.51021 | -1.4124 | -0.9541 |
| C | 0.42393 | -4.0867 | -1.8869 |
| C | -1.0078 | -4.4392 | -1.4389 |
| C | -0.9987 | -4.7941 | 0.0616  |
| C | -0.4958 | -3.6256 | 0.90765 |
| H | 0.98268 | -5.0167 | -2.052  |
| H | -2.0041 | -5.0723 | 0.39579 |
| O | 5.70813 | 0.14233 | 3.57684 |
| O | 4.85729 | -1.5479 | -2.1489 |
| O | 3.13993 | -0.2421 | 2.74508 |
| O | 1.1414  | -1.9684 | 2.54847 |
| O | 2.74718 | -2.8615 | -2.6475 |
| H | 0.17037 | -2.0751 | 2.66713 |
| H | 3.64827 | -2.4425 | -2.7633 |
| C | 5.36059 | 1.47723 | 3.97276 |
| H | 5.25252 | 1.45174 | 5.05875 |
| H | 6.15309 | 2.18516 | 3.7014  |
| H | 4.41388 | 1.77576 | 3.5144  |
| O | -0.817  | -6.6763 | -2.3104 |

|   |         |         |         |
|---|---------|---------|---------|
| C | -1.4965 | -5.6643 | -2.2177 |
| C | -2.8706 | -5.6291 | -2.8637 |
| H | -3.616  | -5.3723 | -2.0972 |
| H | -2.885  | -4.8037 | -3.5914 |
| O | -3.1676 | -6.8617 | -3.4751 |
| H | -2.3701 | -7.411  | -3.3391 |
| O | -1.9189 | -3.3775 | -1.7155 |
| H | -1.9579 | -2.8001 | -0.9296 |
| O | -1.4793 | -2.5417 | 0.90566 |
| C | -2.3559 | -2.5067 | 2.00533 |
| C | -3.4062 | -1.4381 | 1.75907 |
| C | -4.2775 | -1.2408 | 3.00879 |
| H | -2.8905 | -0.5034 | 1.51357 |
| C | -2.2977 | -2.0825 | 4.37457 |
| C | -3.3907 | -1.0147 | 4.26005 |
| O | -1.5567 | -2.1749 | 3.13782 |
| O | -2.8104 | 0.27711 | 4.19109 |
| N | -5.1042 | -0.0369 | 2.83769 |
| C | -1.2886 | -1.8164 | 5.48023 |
| H | -0.5354 | -2.6098 | 5.50536 |
| H | -0.7918 | -0.8564 | 5.31788 |
| H | -1.7948 | -1.7883 | 6.45051 |
| H | -5.9091 | -0.0728 | 3.46153 |
| H | -5.4671 | 0.02418 | 1.88562 |
| H | -3.5023 | 0.79649 | 3.72218 |
| H | -4.0271 | -1.7211 | 0.90219 |
| H | -2.8096 | -3.4966 | 2.17607 |
| H | -4.876  | -2.1509 | 3.17159 |
| H | -4.0265 | -1.105  | 5.15875 |
| H | -2.7929 | -3.051  | 4.54591 |
| H | 0.37125 | -3.5837 | -2.8575 |
| H | -0.361  | -3.9654 | 1.93886 |
| H | -0.3467 | -5.6595 | 0.21949 |

---

**E= -3244.7120297 (Hartree)**
